# Supplementary material for: Sustained expression of unc-4 homeobox gene and unc-37/Groucho in postmitotic neurons specifies the spatial organization of the cholinergic synapses in C. elegans
Source: eLife. 2021 Aug 13;10:e66011. doi: 10.7554/eLife.66011 (PMC8363302; doi:10.7554/eLife.66011)
Supplement: Figure 1—figure supplement 1—source data 1. [file elife-66011-fig1-figsupp1-data1.xlsx]

## Sheet: Sheet1
Figure 1-figure supplement 1A-C			Fluorescence intensity of GFP and mCherry channels (AU)
genotype	wyIs446				unc-4(e120); wyIs446					unc-4(e120); mizIs3
	Distance (μm)	GFP	mCherry		Distance (μm)	GFP	mCherry		Distance (μm)	GFP	mCherry
	0	8.6667	1.6667		0	10.6003	0.566633		0	6.52256	2.55556
	0.069	7.8	1.5333		0.069	9.867	0.4667		0.069	7.32189	2.35559
	0.138	9.2	2		0.138	8.33367	0.433367		0.138	9.02222	3.05552
	0.207	9.1333	1.9		0.207	7.29967	0.433367		0.207	10.9441	2.71111
	0.276	8.1667	2.4333		0.276	6.39967	0.566667		0.276	15.2441	0.91111
	0.345	8.0667	1.7		0.345	7.06633	0.733333		0.345	21.6552	2.05552
	0.414	7.7667	1.7		0.414	6.95522	0.322222		0.414	24.7886	2.42226
	0.483	8.1667	1.9333		0.483	7.07744	0.211144		0.483	27.8886	2.08886
	0.552	8.1	2.1		0.552	7.59967	0.566667		0.552	31.6114	1.74444
	0.621	8.3667	1.7		0.621	7.56667	0.133367		0.621	35.1889	1.78889
	0.69	8.1333	2.0333		0.69	9.15522	0.188922		0.69	40.3559	1.78889
	0.759	7.3333	1.1333		0.759	10.9997	0.533367		0.759	41.7997	1.16667
	0.828	8.2333	1.2333		0.828	11.7003	0.733333		0.828	41.0337	1.53337
	0.897	7.9333	1.5667		0.897	12.9663	0.700033		0.897	36.5663	1.73333
	0.966	7.6	1.1667		0.966	10.5226	0.455556		0.966	35.7003	2.43333
	1.035	7.4	1.5		1.035	10.8892	0.122222		1.035	31.3552	1.95552
	1.104	9.3	1.6		1.104	11.3892	0.422222		1.104	27.9781	2.31111
	1.173	9.7333	1.2667		1.173	13.9552	0.188922		1.173	30.9444	3.01114
	1.242	12.5	1.5		1.242	17.5778	0.311078		1.242	34.4886	2.28886
	1.311	15	1.2667		1.311	23.4444	0.344444		1.311	50.3889	2.25559
	1.38	16.7	1.0667		1.38	30.1111	0.644411		1.38	61.1441	1.44441
	1.449	19.1333	1.5667		1.449	33.7108	0.477778		1.449	71.6997	3.09997
	1.518	17.5	1.1667		1.518	32.8337	0.466667		1.518	78.3003	1.86663
	1.587	15.6	1.5333		1.587	29.0448	0.377778		1.587	77.9559	2.22219
	1.656	13.3333	1.3		1.656	21.8667	0.299967		1.656	76.8886	1.52226
	1.725	11.9667	1.4		1.725	16.667	0.3		1.725	75.8111	2.31111
	1.794	13.7667	1.4333		1.794	12.1778	0.077778		1.794	74.1226	2.02226
	1.863	17.1667	1.6		1.863	8.62222	0.055522		1.863	74.9781	1.27781
	1.932	21.0667	1.4667		1.932	7.62222	0.255522		1.932	74.4667	1.99997
	2.001	22.1	1.0333		2.001	7.14444	0.277744		2.001	65.4886	2.18886
	2.07	22.2667	1.8		2.07	6.56633	0.266633		2.07	47.7003	1.80003
	2.139	19.6667	2.4333		2.139	6.133	0.3333		2.139	24.1556	2.22226
	2.208	17.3	2.3		2.208	5.92189	0.255589		2.208	17.4444	2.51114
	2.277	16.4333	2.7		2.277	6.35522	0.322222		2.277	18.1997	1.83337
	2.346	11.9	2.6		2.346	6.17778	0.311078		2.346	21.7667	2.49997
	2.415	9.8333	2.0333		2.415	5.97744	0.211144		2.415	24.8556	1.62226
	2.484	8.7333	1.9333		2.484	6.34444	0.344444		2.484	30.3111	1.67781
	2.553	7.3	2.1		2.553	7.29967	0.199967		2.553	39.4667	1.53337
	2.622	6.3333	1.8333		2.622	6.62189	0.288889		2.622	43.3552	1.42222
	2.691	6.3	2.3667		2.691	6.70033	0.133333		2.691	46.7778	0.87778
	2.76	6.4	2.7		2.76	6.42256	0.755556		2.76	48.8778	2.34448
	2.829	6.1667	2.6667		2.829	6.77744	0.744444		2.829	44.7774	1.14444
	2.898	5.9	2.4667		2.898	6.033	0.3667		2.898	43.0667	1.76667
	2.967	5.2333	2.2667		2.967	5.80033	0.166633		2.967	40.9556	1.88886
	3.036	5.1333	2.1667		3.036	5.92222	0.422222		3.036	35.0108	3.07778
	3.105	5.6	1.7667		3.105	5.72222	0.555522		3.105	30.033	1.3
	3.174	5.2	2.4		3.174	4.82256	0.455556		3.174	28.2889	1.75559
	3.243	5.4	2.7333		3.243	5.47811	0.144411		3.243	23.8448	2.31108
	3.312	5.2333	3.0333		3.312	6.01111	0.444411		3.312	18.6556	2.95556
	3.381	5.1333	2.8333		3.381	5.44478	0.611078		3.381	14.4333	2.23333
	3.45	6.0667	2.5		3.45	5.74444	0.211144		3.45	10.5778	2.71108
	3.519	6.2	3.0667		3.519	6.01078	0.311078		3.519	7.65522	3.12222
	3.588	7.2	3.4667		3.588	6.08856	0.522256		3.588	8.34411	1.91111
	3.657	7.8	3.1667		3.657	5.43367	0.599967		3.657	6	2.0333
	3.726	8.3333	3		3.726	5.36633	0.400033		3.726	5.12189	1.95559
	3.795	10.4	2.1333		3.795	5.73367	0.833367		3.795	4.43333	2.60003
	3.864	12.7	2.7333		3.864	6.233	0.4667		3.864	4.01111	2.11111
	3.933	14.3667	2.7		3.933	5.95589	0.188889		3.933	3.78889	2.15559
	4.002	16.4667	2.6333		4.002	5.933	0		4.002	3.71111	2.17781
	4.071	18.8	2.1667		4.071	6.18889	0.255589		4.071	4.34478	3.11108
	4.14	19.2333	2.2333		4.14	6.01144	0.344444		4.14	4.82189	2.15559
	4.209	20.0667	2.1333		4.209	7.067	0.5333		4.209	7.12222	2.92222
	4.278	17.8667	1.4667		4.278	6.74478	0.077778		4.278	9.467	1.7333
	4.347	15.5333	1.7667		4.347	7.31144	0.311144		4.347	16.7886	2.62226
	4.416	10.6333	1.5667		4.416	7.87811	0.277811		4.416	28.4781	1.87781
	4.485	7.5667	1.5333		4.485	8.47811	0.144411		4.485	39.3889	1.35559
	4.554	7.1	1.4		4.554	7.55556	0.288856		4.554	46.1003	2.83333
	4.623	6.7333	1.2667		4.623	7.55522	0.522222		4.623	48.0226	2.22226
	4.692	5.9667	1.7667		4.692	7.52189	0.122189		4.692	51.1337	2.63337
	4.761	5.6333	1.6333		4.761	7.48889	0.188889		4.761	51.9886	1.78886
	4.83	6.4667	1.4333		4.83	6.93333	0.400033		4.83	55.4556	1.68886
	4.899	6.4333	1.6333		4.899	6.667	0.4333		4.899	59.5003	1.83333
	4.968	6	1.6		4.968	6.92256	0.022256		4.968	61.4663	1.63333
	5.037	6.9	1.9667		5.037	6.71111	0.077811		5.037	63.7663	2.26663
	5.106	6.7	2.3		5.106	7.06633	0		5.106	63.9781	2.17781
	5.175	7.1333	1.3		5.175	7.33367	0.066667		5.175	63.6552	1.55552
	5.244	6.4	1.3		5.244	9.90033	0.066633		5.244	63.3774	0.64444
	5.313	6.6	1.5333		5.313	11.1663	0.233333		5.313	63.3892	3.42222
	5.382	5.9667	1.6667		5.382	15.5222	0.455522		5.382	61.5003	3.36663
	5.451	6.4667	1.7333		5.451	20.9333	0.733333		5.451	58.9448	2.34448
	5.52	7.1	1.5		5.52	28.3667	0.933367		5.52	55.2781	1.87781
	5.589	7.4667	1.5667		5.589	35.8114	0.377744		5.589	46.833	1.9333
	5.658	7.4	1.3333		5.658	45.0333	0.566633		5.658	30.1559	0.88889
	5.727	7.9667	1.3667		5.727	49.4997	0.533367		5.727	22.1663	0.96663
	5.796	8.7	2.2333		5.796	44.1444	0.411144		5.796	13.7556	1.95556
	5.865	7.6	1.8333		5.865	38.0333	0.566633		5.865	7.84478	1.61108
	5.934	7.8333	2		5.934	28.3886	0.388856		5.934	5.95522	1.58892
	6.003	9.3667	1.6667		6.003	22.6556	0.222256		6.003	4.84478	2.41108
	6.072	11.7333	1.5667		6.072	18.6333	0.866633		6.072	5.76667	2.93337
	6.141	13.0667	1.8333		6.141	16.9114	1.14444		6.141	6.067	2.9333
	6.21	14.8667	1.9		6.21	16.0441	0.811111		6.21	6.33367	3.13337
	6.279	17.2333	1.6		6.279	15.3663	0.800033		6.279	8.31144	2.24444
	6.348	18.1333	1.8		6.348	14.6222	0.922222		6.348	10.5108	2.34448
	6.417	21.5	1.9		6.417	13.0226	0.755556		6.417	10.7448	1.61108
	6.486	24.4	2.2		6.486	12.1889	0.355589		6.486	9.43367	1.76667
	6.555	27.1333	1.9667		6.555	10.2778	0.911078		6.555	8.98922	1.15552
	6.624	29.5667	1.3667		6.624	10.6111	1.24441		6.624	8.84411	2.01111
	6.693	31.8333	1.4		6.693	10.6114	1.24444		6.693	10.5114	1.87774
	6.762	33.8667	1.6333		6.762	10.233	1.4667		6.762	12.8108	2.81108
	6.831	31.7	1.0333		6.831	10.9892	1.52222		6.831	24.1559	0.92219
	6.9	27.5667	0.9333		6.9	12.3886	1.35556		6.9	40.2556	1.05556
	6.969	23.1333	1.4333		6.969	14.2552	1.45552		6.969	56.0333	2.63333
	7.038	19.9333	1.3		7.038	22.9337	2.59997		7.038	62.7552	1.98892
	7.107	14.7667	1.3333		7.107	34.6997	4.46667		7.107	63.6219	1.88889
	7.176	11.5333	1.4667		7.176	56.7333	5.53333		7.176	62.2444	2.37774
	7.245	7.8667	1.1333		7.245	69.633	7.6		7.245	59.433	2.1333
	7.314	6.7333	1.3333		7.314	82.8003	8.86663		7.314	61.6997	1.76667
	7.383	6.3667	1.2		7.383	92.533	11.4667		7.383	60.0552	3.32222
	7.452	5.5	1.5667		7.452	105.911	13.7445		7.452	55.9	3.8667
	7.521	5.0333	1.3333		7.521	116.6	15.6333		7.521	52.1556	4.92226
	7.59	4.8667	1.2		7.59	129.456	18.9556		7.59	42.5444	8.77774
	7.659	4.6	0.9667		7.659	137.433	23.9666		7.659	30.8	12.1333
	7.728	4.8333	1.2333		7.728	142.489	25.9889		7.728	22.4667	10.7
	7.797	5	1.1667		7.797	144.289	28.2222		7.797	17.1781	10.2444
	7.866	4.8333	1.3333		7.866	144.645	28.6445		7.866	13.1667	10.0667
	7.935	4.7667	1.1333		7.935	140.733	27.9333		7.935	12.6	10.2333
	8.004	4.6	1.5333		8.004	132.4	24.6667		8.004	11.1663	8.33333
	8.073	4.4667	1.5		8.073	122.3	22.2333		8.073	8.533	8.9333
	8.142	5.2667	1.6		8.142	116.6	22.8		8.142	6.82189	6.48889
	8.211	4.9667	1.3		8.211	114	23.4		8.211	5.11078	4.17778
	8.28	4.9333	1.0333		8.28	110.489	21.1889		8.28	4.62189	3.45559
	8.349	4.3333	1.4667		8.349	106.367	19.4		8.349	3.7	4.4333
	8.418	4.6	1.4		8.418	101.133	16.1		8.418	3.833	3.2667
	8.487	5	1.6667		8.487	89.9108	12.6445		8.487	4.77811	2.54441
	8.556	4.3667	1.9333		8.556	72.7444	8.21114		8.556	4.81144	3.51114
	8.625	4.2	1.9		8.625	50.967	6.7		8.625	2.84478	2.61108
	8.694	4.5333	1.7		8.694	36.9444	4.97774		8.694	2.81144	3.17774
	8.763	5.1	1.7333		8.763	26.9	3.3333		8.763	3.4	1.3
	8.832	5.1667	1.7		8.832	19.4222	2.85552		8.832	3.067	2.6333
	8.901	5.4333	1.5667		8.901	14.4114	2.27774		8.901	3.467	1.7
	8.97	5.4667	1.3667		8.97	12.6444	1.61114		8.97	4.05589	1.92219
	9.039	4.8	1.5		9.039	9.53367	1.16667		9.039	3.67811	3.07781
	9.108	4.9	1.5333		9.108	8.267	1.1333		9.108	3.96633	2.60003
	9.177	4.9	1.4		9.177	8.50033	1.13333		9.177	4.47778	2.74448
	9.246	4.6	1.5333		9.246	8.02256	0.722256		9.246	4.59967	1.86667
	9.315	6.4	1.9333		9.315	7.867	0.9		9.315	4.633	2.6667
	9.384	7.2667	1.8		9.384	7.73367	0.599967		9.384	3.13367	2.33337
	9.453	8.4	1.5667		9.453	8.41111	0.744411		9.453	3.533	3.5333
	9.522	8.5333	1.4333		9.522	8.77778	0.811078		9.522	2.48856	0.45556
	9.591	10.5333	1.7667		9.591	8.22256	0.455556		9.591	3.45522	2.58892
	9.66	13.0667	1.3		9.66	8.78856	0.488856		9.66	3.34444	3.14444
	9.729	16.6333	1.3667		9.729	9.433	0.5667		9.729	3.92189	2.52219
	9.798	20.3	1.3667		9.798	9.18922	0.555522		9.798	4.08856	2.15556
	9.867	24.3	1.3667		9.867	11.1441	0.511111		9.867	3.76667	2.23337
	9.936	26.8667	1.7667		9.936	11.9108	0.444478		9.936	2.6	1.4667
	10.005	26.7	1.7667		10.005	14.767	0.6		10.005	3.12256	1.82226
	10.074	22.8	1.9333		10.074	18.9448	0.377778		10.074	3.47778	2.61108
	10.143	18.7	1.8333		10.143	27.2108	0.377778		10.143	3.82189	2.88889
	10.212	14.2333	1.3		10.212	35.7667	0.599967		10.212	3.42256	1.95556
	10.281	10.9333	1.6667		10.281	42.1889	0.555589		10.281	3.54411	2.14441
	10.35	7.7667	2.0667		10.35	46.7997	0.499967		10.35	2.94411	2.74441
	10.419	7.4667	1.3667		10.419	50.5222	0.655522		10.419	3.82222	2.32222
	10.488	5.7667	1.8		10.488	49.4114	0.711144		10.488	2.68922	2.65552
	10.557	5.9	1.5333		10.557	45.2892	0.722222		10.557	3.433	2.6667
	10.626	5.3333	1.7333		10.626	38.0892	0.822222		10.626	2.633	1.8333
	10.695	4.9	1.5		10.695	33.4337	0.933367		10.695	2.65556	0.92226
	10.764	5.0667	1.8333		10.764	28.5552	1.18892		10.764	3.18922	1.95552
	10.833	5.5333	1.5667		10.833	23.1111	1.01111		10.833	2.75589	3.12219
	10.902	5.4333	1.4		10.902	24.3333	1.26663		10.902	2.66633	1.93333
	10.971	4.5333	1.5667		10.971	26.2114	3.11114		10.971	3.07811	1.44441
	11.04	5.3667	1.5667		11.04	36.6111	4.31111		11.04	2.43333	1.03333
	11.109	5.1	1.6333		11.109	55.0667	6.46667		11.109	3.94478	2.21108
	11.178	4.6333	1.3333		11.178	71.3444	8.74444		11.178	3.58922	2.75552
	11.247	4.7	1.7333		11.247	84.9003	12.3666		11.247	2.47778	2.37778
	11.316	4.3667	2.2		11.316	94.6108	13.3778		11.316	2.94411	1.81111
	11.385	4	2.1333		11.385	102.833	15.6		11.385	2.93367	2.53337
	11.454	4.8	2.0333		11.454	110.466	18.9		11.454	1.65522	1.55552
	11.523	5.2667	2.5333		11.523	115.966	19.6333		11.523	2.39967	0.99997
	11.592	4.4	2.1667		11.592	118.389	19.9556		11.592	2.51078	2.11108
	11.661	5.3667	1.8667		11.661	119.655	18.3222		11.661	2.33333	2.50003
	11.73	5.5	1.7		11.73	120.644	16.7111		11.73	3.21144	1.91114
	11.799	5.4667	1.7667		11.799	120.789	16.2889		11.799	2.41111	1.84441
	11.868	5.2667	1.7333		11.868	120.744	16.3444		11.868	2.55522	1.18892
	11.937	5.3667	2.4		11.937	115.245	18.5111		11.937	2.87811	2.44441
	12.006	4.8667	1.5667		12.006	107.333	17.9667		12.006	2.81078	1.87778
	12.075	4.8667	2.0333		12.075	101.989	18.0889		12.075	2.41144	0.77774
	12.144	4.8333	1.9		12.144	98.9556	18.0223		12.144	2.72222	0.78892
	12.213	5.2	2.2		12.213	94.9781	16.2444		12.213	3.86633	2.36663
	12.282	4.8333	1.8667		12.282	88.8663	13.4		12.282	2.96633	1.80003
	12.351	5.7333	1.7333		12.351	79.9552	11.3889		12.351	3.79967	2.49997
	12.42	5.9	1.7667		12.42	68.8114	6.87774		12.42	3.57744	1.44444
	12.489	5.6333	1.6		12.489	51.0222	5.35552		12.489	3.05522	1.78892
	12.558	5.8	1.9		12.558	33.4552	3.25552		12.558	3.333	1.5667
	12.627	6.7667	2.5667		12.627	25.1892	2.28892		12.627	3.067	1.8333
	12.696	8.2	2.5		12.696	19.1003	2.03333		12.696	3.88856	3.38886
	12.765	10.0333	2.5		12.765	16.7	1.2667		12.765	2.96633	2.73333
	12.834	13.3	2.6333		12.834	18.7003	1.23333		12.834	2.01144	1.21114
	12.903	16.1667	3.0333		12.903	18.5886	1.38886		12.903	3.18856	1.75556
	12.972	20.4667	2.6667		12.972	21.733	0.8667		12.972	2.92256	2.78886
	13.041	26.1667	2.8667		13.041	25.1333	0.933333		13.041	3.62222	3.88892
	13.11	28.9	3.6333		13.11	28.6556	0.755556		13.11	3.92189	2.78889
	13.179	28.5333	3.5		13.179	34.833	0.5333		13.179	4.42222	3.28892
	13.248	25.7667	2.9667		13.248	35.4114	0.477744		13.248	3.71111	2.67781
	13.317	21.4667	2.7667		13.317	31.5997	0.599967		13.317	3.81144	1.97774
	13.386	19.1	3.2667		13.386	28.3441	1.17781		13.386	3.66667	0.59997
	13.455	16.3333	2.4		13.455	21.5441	1.17781		13.455	3.16667	1.63337
	13.524	12.3667	2.5333		13.524	16.1667	1.13337		13.524	3.28889	2.22219
	13.593	9.6333	2		13.593	12.2892	1.22222		13.593	2.95589	1.75559
	13.662	7.7667	2.3333		13.662	9.57744	0.844444		13.662	3.55522	2.55552
	13.731	7.1667	2.4		13.731	9.36667	0.933367		13.731	3.07744	2.94444
	13.8	6.7333	2.5333		13.8	10.1559	1.05559		13.8	4.41144	2.87774
	13.869	6.4333	2.1		13.869	10.9556	0.855556		13.869	4.41144	4.27774
	13.938	6.6667	2.5667		13.938	11.8774	0.577744		13.938	3.68889	4.62219
	14.007	6.2333	2.1667		14.007	11.6886	0.888856		14.007	3.21111	4.94441
	14.076	5.4667	2.6		14.076	9.533	0.9		14.076	5.41111	5.71111
	14.145	5.4333	2.8667		14.145	8.67778	0.977778		14.145	6.167	5.1667
	14.214	5.1	2.7667		14.214	6.91144	0.511144		14.214	8.43333	8.10003
	14.283	5.1	2.9		14.283	7.01078	0.411078		14.283	12.0778	11.4445
	14.352	5.1667	2.8333		14.352	6.88922	0.422222		14.352	17.0997	13.4
	14.421	5.5667	2.8		14.421	6.21144	0.611144		14.421	20.5441	15.7444
	14.49	5.8667	1.9		14.49	6.04478	0.977778		14.49	24.2	21.9667
	14.559	7.3333	2.4		14.559	6.14444	0.611144		14.559	24.5226	22.1556
	14.628	7.9333	3		14.628	6.13367	0.899967		14.628	28.7219	21.6222
	14.697	10.5333	3.2333		14.697	6.41111	0.277811		14.697	26.333	23.3
	14.766	16.1333	3.1		14.766	6.78856	0.422256		14.766	25.9	21.7
	14.835	20.4	2.4667		14.835	7.30033	0.900033		14.835	24.1667	23.4334
	14.904	24.1	2.9667		14.904	8.22222	0.588922		14.904	23.8667	17.6
	14.973	26.9333	3.0667		14.973	10.1114	0.477744		14.973	20.3997	17.2334
	15.042	27.0667	3.4		15.042	9.33367	0.933367		15.042	24.5108	13.1778
	15.111	25.4333	3.1		15.111	9.90033	0.566633		15.111	24.1781	8.71111
	15.18	22.9	2.7		15.18	9.72189	0.722189		15.18	30.0889	8.58889
	15.249	20.4	3.3		15.249	10.2448	0.644478		15.249	35.4778	6.17778
	15.318	18	2.4667		15.318	10.1559	1.05559		15.318	40.7441	4.01111
	15.387	16	3.0667		15.387	9.033	0.7667		15.387	46.5778	4.44448
	15.456	15.9333	3		15.456	9.54411	0.577811		15.456	54.1003	3.30003
	15.525	16.4667	2.4333		15.525	9.28922	0.688922		15.525	65.6337	3.83337
	15.594	19.1	2.5667		15.594	9.24478	0.777778		15.594	75.0222	3.15552
	15.663	25.9333	1.9333		15.663	9.07811	0.344411		15.663	82.0667	3.19997
	15.732	32.3	1.9667		15.732	10.2892	0.522222		15.732	87.9556	2.28886
	15.801	36.4	2.1333		15.801	11.6114	0.911144		15.801	89.9114	3.17774
	15.87	35.7667	1.9		15.87	14.8222	1.15552		15.87	92.3114	3.61114
	15.939	36.0667	2.0333		15.939	19.4444	1.64444		15.939	93.9778	3.57778
	16.008	32.4667	2.5		16.008	23.0333	1.56663		16.008	91.6886	1.58886
	16.077	28.6333	2.3667		16.077	26.8889	1.98889		16.077	88.7444	3.57774
	16.146	27.2	2		16.146	27.033	1.9		16.146	86.1333	2.90003
	16.215	24.2333	1.7667		16.215	21.6886	1.58886		16.215	83.7111	1.94441
	16.284	20.7667	2.6		16.284	17.5774	1.51114		16.284	80.0778	2.87778
	16.353	19	3.0667		16.353	13.6111	1.27781		16.353	76.1778	1.71108
	16.422	16.1333	1.9		16.422	11.7552	0.822222		16.422	72.0337	1.66667
	16.491	15.1	1.5333		16.491	11.5226	0.955556		16.491	68.3556	2.08886
	16.56	14.5	1.3667		16.56	12.367	1.2667		16.56	67.0444	2.21114
	16.629	13.3	1.5333		16.629	14.3333	1.13333		16.629	62.0337	2.99997
	16.698	11.2667	1.7		16.698	17.6774	0.944444		16.698	57.2552	3.35552
	16.767	9.8	2.0667		16.767	22.0667	0.666667		16.767	54.2997	3.39997
	16.836	8.5667	1.9667		16.836	28.3781	0.477811		16.836	51.5441	1.17781
	16.905	7.9333	1.9333		16.905	33.3997	0.466667		16.905	43.1333	2.90003
	16.974	7.5667	2.3		16.974	47.033	0.9667		16.974	29.6114	2.54444
	17.043	8.5	2.9667		17.043	55.5886	0.622256		17.043	17.6114	2.04444
	17.112	10.0667	2.5667		17.112	63.0667	0.833367		17.112	12.933	2.2333
	17.181	11	2.7333		17.181	69.3337	0.899967		17.181	9.66667	1.56667
	17.25	11.9	3.9333		17.25	68.1892	0.588922		17.25	8.77778	2.07778
	17.319	12.7333	4.7		17.319	63.3226	0.388856		17.319	7.10033	2.96663
	17.388	13.9667	5.4		17.388	55.8889	0.888889		17.388	6.367	2.0667
	17.457	15.8	5.5667		17.457	44.1781	0.844411		17.457	8.03333	2.80003
	17.526	17.7333	6.4667		17.526	29.1778	0.877778		17.526	7.21111	2.17781
	17.595	19.5333	7.6667		17.595	21.3997	0.933367		17.595	6.57778	2.04448
	17.664	18.4333	6.6667		17.664	15.5892	0.655522		17.664	5.14411	1.57781
	17.733	19.0333	6.1667		17.733	12.8219	0.888889		17.733	5.37744	1.21114
	17.802	19.9	5.4667		17.802	10.6003	0.466633		17.802	4.57744	1.71114
	17.871	22.3	5.5		17.871	7.98889	0.488889		17.871	5.06667	2.56667
	17.94	23.3667	6.0333		17.94	8.15589	0.855589		17.94	4.71078	2.04448
	18.009	22.5	4.9333		18.009	7.63367	1.06667		18.009	5	2.4
	18.078	21.6667	4.4667		18.078	7.95589	1.08889		18.078	4.59967	1.23337
	18.147	21.8	2.7333		18.147	8.61078	0.944478		18.147	4.3	1
	18.216	21.6	2.5333		18.216	11.1114	1.31114		18.216	4.233	2
	18.285	25.8	1.9		18.285	11.2003	1.30003		18.285	3.64478	1.74448
	18.354	32.6	2.2333		18.354	10.9552	1.08892		18.354	3.48889	1.48889
	18.423	37.6333	2.4333		18.423	9.78889	1.58889		18.423	5.17744	2.11114
	18.492	39.7	2.8667		18.492	8.80033	1.73333		18.492	4.7	2.1333
	18.561	39.7	1.6667		18.561	8.47811	0.711111		18.561	4.567	2.0333
	18.63	38.8667	2.6		18.63	7.97778	1.07778		18.63	3.38889	1.85559
	18.699	37.2	2.2		18.699	9.14478	1.41108		18.699	4.16633	0.76663
	18.768	34.4667	1.4667		18.768	10.4441	1.17781		18.768	4.733	1.9
	18.837	28.9667	1.6		18.837	11.1441	1.94441		18.837	5.967	1.8
	18.906	23.8333	1.5667		18.906	12.2448	1.67778		18.906	6.14444	1.37774
	18.975	21.8667	1.8333		18.975	11.7219	1.68889		18.975	5.65556	1.65556
	19.044	18.3333	1.8333		19.044	12.0114	1.61114		19.044	6.25522	3.42222
	19.113	20.1	2.2		19.113	11.5667	1.43337		19.113	5.97744	3.67774
	19.182	19.8333	2.0667		19.182	10.0997	1.73337		19.182	6.48922	3.68892
	19.251	20.5333	1.8667		19.251	8.78889	1.32219		19.251	6.65556	3.48886
	19.32	21.6667	1.6667		19.32	9.067	1.1		19.32	5.95589	3.32219
	19.389	22.0333	1.5667		19.389	9.34444	1.14444		19.389	5.95589	2.55559
	19.458	21.3	1.9		19.458	10.1552	1.22222		19.458	6.15589	4.35559
	19.527	18.0333	1.9667		19.527	10.5448	1.31108		19.527	5.233	5.3667
	19.596	14.1667	1.3667		19.596	13.0889	1.15559		19.596	5.57744	4.97774
	19.665	12.3333	1.8		19.665	18.6892	1.58892		19.665	4.47811	3.84441
	19.734	11.6	1.9		19.734	26.8	1.2667		19.734	5.34444	3.91114
	19.803	11.1667	1.3667		19.803	37.4219	0.755589		19.803	5.17811	3.34441
	19.872	9.6333	2.1667		19.872	50.1	1.6		19.872	6.01078	5.67778
	19.941	9.3333	2.0333		19.941	59.9219	2.38889		19.941	6.44444	7.41114
	20.01	9.1333	3		20.01	66.167	1.6333		20.01	9.15589	9.15559
	20.079	8.7	2.5667		20.079	68.3108	1.31108		20.079	13.7997	12.6
	20.148	8.5	2.1		20.148	64.8219	1.12219		20.148	15.9552	14.2222
	20.217	8.3333	2.2667		20.217	57.4552	1.55552		20.217	20.5114	17.8777
	20.286	8.2667	2.9		20.286	50.5889	1.15559		20.286	26.7556	22.7556
	20.355	8.2667	1.6667		20.355	42.0108	1.27778		20.355	30.8111	25.1778
	20.424	8.2667	1.9333		20.424	34.4108	1.11108		20.424	33.0781	31.2778
	20.493	9.2667	1.8667		20.493	28.1222	1.12222		20.493	35.8444	35.4777
	20.562	11.7	2.6333		20.562	23.9448	1.31108		20.562	36.067	37.5
	20.631	15.8	2.0667		20.631	21.3774	1.94444		20.631	32.9663	31.4
	20.7	20.1333	1.7		20.7	21.0108	2.21108		20.7	29.4337	28.7667
	20.769	23.0667	1.8		20.769	21.6222	2.48892		20.769	26.7226	22.3889
	20.838	21.2667	1.9		20.838	23.4448	3.01108		20.838	25.5114	17.0111
	20.907	18.2667	1.9333		20.907	29.2444	4.84444		20.907	28.9667	11.3334
	20.976	14.4667	2.1		20.976	41.9552	7.68892		20.976	40.6552	8.75552
	21.045	13.1	1.7		21.045	60.6892	9.52222		21.045	57.7337	7.59997
	21.114	11.4333	1.3		21.114	77.6667	11.9667		21.114	73.7559	7.32219
	21.183	10.8333	1.7		21.183	85.7448	13.5778		21.183	82.8774	8.74444
	21.252	9.9667	2.2		21.252	88.8444	13.2111		21.252	87.8333	10.2666
	21.321	9.6667	2.1333		21.321	92.3444	13.9111		21.321	91.2663	14.2
	21.39	11.3	2.1333		21.39	90.0556	12.7223		21.39	90.3219	14.6222
	21.459	12.1667	2.6333		21.459	86.4219	9.68889		21.459	92.7219	17.6889
	21.528	12.8333	1.9667		21.528	80.367	6.4667		21.528	96.0889	22.3556
	21.597	14.1667	2.4333		21.597	68.4444	4.31114		21.597	95.3552	23.4555
	21.666	15.4	1.6333		21.666	57.0889	3.68889		21.666	92.1003	28.8
	21.735	14.6333	2.0667		21.735	50.0667	2.26667		21.735	85.9667	33.2667
	21.804	12.4	1.7333		21.804	48.9997	1.79997		21.804	75.9448	35.0778
	21.873	12.2333	1.8667		21.873	48.4781	1.44441		21.873	56.6226	30.7889
	21.942	11.1333	2		21.942	46.3556	1.42226		21.942	36.4333	23.5
	22.011	11.6	2.0333		22.011	39.3337	1.43337		22.011	26.7226	24.8223
	22.08	14.0333	2.0333		22.08	29.7663	1.16663		22.08	19.7663	20.4
	22.149	16.5667	1.7		22.149	21.7667	0.966667		22.149	15.8552	16.8889
	22.218	20.0667	1.6667		22.218	17.0556	1.48886		22.218	12.0003	11.1
	22.287	22.3333	1.5333		22.287	15.2333	1.00003		22.287	10.8	8.9333
	22.356	29.7333	2.1667		22.356	14.1114	0.877744		22.356	9.36667	6.86667
	22.425	34.9	1.5667		22.425	13.9892	1.02222		22.425	7.61144	5.54444
	22.494	35.7667	1.4667		22.494	12.2663	1.10003		22.494	8.11144	6.11114
	22.563	33.2333	1.8667		22.563	10.8333	0.700033		22.563	6.61078	4.64448
	22.632	29.5333	1.5333		22.632	10.533	0.8		22.632	6.19967	2.83337
	22.701	26.4	2.2		22.701	9.1	1.1667		22.701	7.59967	4.26667
	22.77	24.1333	2.4667		22.77	9.42189	1.22219		22.77	6.2	5.2333
	22.839	20.7	2.7333		22.839	9.51144	1.01114		22.839	7.39967	2.99997
	22.908	17.9667	2.4667		22.908	10.9108	1.41108		22.908	7.467	3.0333
	22.977	15.5333	2.2		22.977	9.71111	1.01111		22.977	11.3	3.7333
	23.046	13.2	2.6667		23.046	8.01111	0.444411		23.046	17.3663	2.53333
	23.115	9.9333	2.0667		23.115	7.45522	1.02222		23.115	23.267	2.3
	23.184	8.2333	2.4		23.184	7.84444	1.04444		23.184	33.2114	3.07774
	23.253	7.0333	2.8333		23.253	8.18889	0.988889		23.253	45.7667	2.99997
	23.322	5.6667	3.0667		23.322	8.32189	0.888889		23.322	54.2337	3.59997
	23.391	6.0333	2.5333		23.391	7.54444	0.577744		23.391	63.133	3.1
	23.46	4.8667	2.1333		23.46	7.68889	1.35559		23.46	64.3556	2.75556
	23.529	5	2.5		23.529	8.61078	1.51108		23.529	61.133	1.2667
	23.598	4.8	2.7333		23.598	8.24444	1.17774		23.598	77.733	1.9
	23.667	5.2667	2.2667		23.667	9.88856	0.955556		23.667	91.8667	1.99997
	23.736	4.3	2.8		23.736	10.0226	1.38886		23.736	96.5	1.9
	23.805	4.9333	3.2333		23.805	8.72256	1.05556		23.805	101.156	2.55559
	23.874	5.2667	2.6		23.874	9.08889	1.25559		23.874	102.167	4.03337
	23.943	4.9333	3.1667		23.943	9.88856	0.955556		23.943	97.2663	2.63333
	24.012	4.7333	4.2333		24.012	11.2444	1.11114		24.012	89.633	2.3333
	24.081	4.9333	4.4		24.081	12.5663	1.40003		24.081	81.6111	1.54441
	24.15	6.0667	4.9		24.15	13.2448	1.77778		24.15	68.7781	1.34441
	24.219	7.2	5.5667		24.219	15.6889	2.15559		24.219	55.9886	2.22226
	24.288	9.3	6.8		24.288	17.2663	1.33333		24.288	41.3226	3.08886
	24.357	10.7333	9.1333		24.357	19.0997	1.89997		24.357	29.567	2.9667
	24.426	12.7	10.8333		24.426	20.2333	2.03333		24.426	20.5333	4.16663
	24.495	14.7	10.4333		24.495	20.0778	1.84448		24.495	13.4892	2.08892
	24.564	15.4333	9.8333		24.564	22.3222	1.75552		24.564	8.867	3.6667
	24.633	16.9333	7.7333		24.633	23.7333	1.70003		24.633	6.40033	2.90003
	24.702	19.3667	7.3667		24.702	29.3889	1.78889		24.702	6.27744	2.91114
	24.771	22.8	6.9333		24.771	39.3219	1.62219		24.771	6.08889	2.85559
	24.84	25.8667	6.4667		24.84	51.8333	1.30003		24.84	5.19967	1.13337
	24.909	25.9667	6.5		24.909	64.7552	1.05552		24.909	5.68889	2.08889
	24.978	26.5667	6.5333		24.978	68.3778	0.611078		24.978	3.64444	4.14444
	25.047	25.6667	7.8333		25.047	70.9552	0.788922		25.047	4.39967	1.56667
	25.116	24.3333	8.2667		25.116	68.0667	0.799967		25.116	4.98922	0.92222
	25.185	22.0333	9.0333		25.185	58.2892	0.755522		25.185	5.34411	2.91111
	25.254	19.4	9.2		25.254	43.0552	1.15552		25.254	4.29967	2.33337
	25.323	16.6	7.9333		25.323	29.2111	0.977811		25.323	4.84444	1.97774
	25.392	14.5333	7.8		25.392	22.6219	0.922189		25.392	4.80033	2.16663
	25.461	13.3	7.2		25.461	17.5108	1.01108		25.461	4.97811	1.64441
	25.53	11.4	7.4667		25.53	14.6219	0.622189		25.53	4.52256	1.08886
	25.599	9.9	6.0667		25.599	12.6556	1.02226		25.599	3.37744	1.81114
	25.668	8.6	5.6333		25.668	12.5559	1.28889		25.668	4.07811	1.14441
	25.737	8	5.4		25.737	13.6441	1.61111		25.737	4.32222	2.52222
	25.806	7.7667	5.3667		25.806	15.5	1.7333		25.806	4.13367	3.76667
	25.875	7.1667	5.0667		25.875	15.2556	2.05556		25.875	4.15589	3.35559
	25.944	7.3333	4.3667		25.944	14.9219	2.18889		25.944	4.03333	4.16663
	26.013	6.3333	4.1		26.013	15.5226	2.45556		26.013	4.39967	2.46667
	26.082	6.6	4.3		26.082	18.3	2.9667		26.082	4.36667	4.19997
	26.151	6.7	3.7333		26.151	21.8886	3.78886		26.151	4.567	4.8667
	26.22	6.6333	3.3		26.22	30.0997	4.26667		26.22	4.2	5.2333
	26.289	6.3	2.9667		26.289	33.9889	4.58889		26.289	4.01078	4.84448
	26.358	5.9667	3.3333		26.358	36.0003	5.06663		26.358	3.33333	3.40003
	26.427	6.2333	3.5333		26.427	34.067	5.2333		26.427	3.45589	3.55559
	26.496	7.1333	3.0667		26.496	33.7003	4.26663		26.496	4.46633	4.43333
	26.565	6.9	2.7		26.565	30.7337	4.49997		26.565	3.87744	3.34444
	26.634	9.1333	2.5667		26.634	29.0889	4.68889		26.634	4.48856	2.15556
	26.703	13	3		26.703	29.9886	5.08886		26.703	4.05556	1.42226
	26.772	18.1333	2.3667		26.772	37.5886	6.62226		26.772	3.98856	1.82226
	26.841	22.8667	2.7667		26.841	50.0552	7.82222		26.841	3.75556	2.35556
	26.91	29.2667	2.7333		26.91	63.1441	9.57781		26.91	2.97811	2.01111
	26.979	33.1333	2.4333		26.979	66.8108	10.4445		26.979	3.02222	1.92222
	27.048	33.3	2.5667		27.048	71.0003	8.90003		27.048	4.17811	1.91111
	27.117	29.1333	2.8333		27.117	71.7003	9.46663		27.117	6.31078	2.67778
	27.186	27.1	3.6667		27.186	71.1222	9.22222		27.186	7.467	2.3667
	27.255	23.6	4.3		27.255	66.8559	9.42219		27.255	9.28856	2.65556
	27.324	20.3667	4.3		27.324	65.7111	9.37781		27.324	11.8337	2.83337
	27.393	18.9	2.9333		27.393	70.9781	9.21111		27.393	15.6222	1.45552
	27.462	16.6333	2.2667		27.462	80.833	10.1		27.462	22.5	1.7
	27.531	12.8	2.7667		27.531	93.6556	11.0889		27.531	30.167	2.6333
	27.6	12.3	3.0333		27.6	109.322	13.2222		27.6	38.5448	3.31108
	27.669	11.8	2.7		27.669	116.211	15.3444		27.669	47.9559	1.88889
	27.738	11.6	1.9667		27.738	118.778	17.4444		27.738	58.8333	3.36663
	27.807	12.7333	1.4333		27.807	115.078	20.7111		27.807	68.7556	3.85556
	27.876	16.5667	2.4333		27.876	106.1	20		27.876	76.2781	2.64441
	27.945	17.5	2.7667		27.945	107.355	19.5222		27.945	83.4219	3.45559
	28.014	17.1333	2.3667		28.014	104.477	20.2777		28.014	89.7559	3.22219
	28.083	17	2.3333		28.083	99.7114	17.9444		28.083	94.3	3.8
	28.152	14.2333	1.9667		28.152	96.9441	16.0111		28.152	96.8556	5.45556
	28.221	13.1	2.3333		28.221	91.1559	14.8889		28.221	98.9774	6.34444
	28.29	11.6667	1.9333		28.29	84.5003	11.6		28.29	95.0333	6.56663
	28.359	11.8333	2.1333		28.359	76.0441	8.67781		28.359	89.7226	6.98886
	28.428	11.8	1.8667		28.428	63.8003	7.16663		28.428	84.6448	8.04448
	28.497	14.6667	1.7667		28.497	49.7892	5.28892		28.497	75.6333	10.1666
	28.566	16.7667	1.9667		28.566	36.9774	4.21114		28.566	56.6663	12.6666
	28.635	19.4333	2.1667		28.635	24.9226	3.28886		28.635	38.7559	16.3222
	28.704	23.6	2.3333		28.704	19.9108	2.24448		28.704	30.1552	19.6555
	28.773	30.3667	3.1667		28.773	13.2552	1.88892		28.773	23.4886	20.5889
	28.842	36.6	3.3		28.842	11.4111	1.54441		28.842	23.7226	23.5556
	28.911	36.4	2.9333		28.911	9.42256	1.88886		28.911	26.7222	29.3222
	28.98	36	3.1667		28.98	8.18856	1.18886		28.98	30.4111	34.5111
	29.049	28.2	2.8		29.049	7.58922	1.28892		29.049	33.9997	36.2667
	29.118	20.2	2.7667		29.118	6.78889	1.02219		29.118	39.2108	42.2778
	29.187	14.1667	2.6333		29.187	7.08922	1.28892		29.187	48.4556	49.2889
	29.256	10.3333	3.5		29.256	6.94478	1.41108		29.256	55.3886	57.2889
	29.325	8.6333	4.3333		29.325	6.55522	0.588922		29.325	57.6108	62.3445
	29.394	8.1	3.5333		29.394	7.55522	0.722222		29.394	59.133	63.7
	29.463	7.7	3.3		29.463	6.57744	1.14444		29.463	54.9892	64.0555
	29.532	6.9	3.5333		29.532	7.07744	0.911144		29.532	45.2774	59.6777
	29.601	6.4	3.5667		29.601	6.93367	1.19997		29.601	35.1892	46.1889
	29.67	6.0667	3.8333		29.67	8.91078	0.844478		29.67	25.8111	32.3111
	29.739	6.3	4.2667		29.739	9.41111	1.34441		29.739	17.2222	22.0555
	29.808	6.5	4.1667		29.808	12.7441	1.54441		29.808	11.1886	12.8556
	29.877	6.1	4.2667		29.877	16.8889	1.15559		29.877	8.83333	9.83333
	29.946	6.2	4.2333		29.946	22.8444	0.577744		29.946	7.00033	8.43333
	30.015	6.4667	3.9333		30.015	29.0667	0.666667		30.015	7.133	7.3667
	30.084	6.6	3.1333		30.084	33.4219	1.02219		30.084	7.08856	5.78886
	30.153	6.3333	2.5667		30.153	36.833	1.2		30.153	7.27744	4.27774
	30.222	5.5333	2		30.222	36.9781	0.811111		30.222	9.75556	4.08886
	30.291	5.1667	2.1667		30.291	34.7	0.8667		30.291	11.1448	4.21108
	30.36	4.5667	2.5		30.36	30.333	0.7333		30.36	12.8448	3.44448
	30.429	5	2.0333		30.429	29.5	1.3		30.429	16.9226	4.18886
	30.498	5.2	1.9		30.498	29.8219	1.42219		30.498	23.5226	4.35556
	30.567	5.8	1.8		30.567	31.2111	1.97781		30.567	31.1444	3.81114
	30.636	6.9333	2.4333		30.636	33.5337	2.39997		30.636	42.1114	3.74444
	30.705	6.3333	2.8667		30.705	37.1552	3.28892		30.705	51.033	4.3667
	30.774	6.1667	2.6667		30.774	38.2003	4.30003		30.774	60.7559	5.08889
	30.843	6.8667	2.7		30.843	45.3667	5.56667		30.843	67.9441	5.41111
	30.912	7.1667	2.0667		30.912	53.0889	7.68889		30.912	77.1111	4.34441
	30.981	8	2.5		30.981	58.0226	9.08886		30.981	82.9108	3.94448
	31.05	11.9667	3.2		31.05	62.1997	9.26667		31.05	88.3222	6.02222
	31.119	14.7667	3.0667		31.119	66.3111	9.74441		31.119	89.0774	6.44444
	31.188	18.8	3.4		31.188	69.5886	11.0556		31.188	89.3778	6.57778
	31.257	23.2	3.0667		31.257	73.9222	10.2889		31.257	90.167	7.2333
	31.326	24.9667	2.8333		31.326	69.6	9.5		31.326	86.8219	8.72219
	31.395	23.5667	2.3		31.395	66.4219	8.05559		31.395	82.1337	10.4667
	31.464	20.9	1.7667		31.464	61.7226	8.22226		31.464	77.0448	14.6111
	31.533	16.9	2		31.533	57.6781	7.34441		31.533	68.7448	18.1111
	31.602	13.8	1.8333		31.602	51.4552	6.78892		31.602	62.767	23.7
	31.671	10.9667	2.2333		31.671	48.1111	5.67781		31.671	59.767	30.7667
	31.74	8.3	1.7333		31.74	43.8108	6.54448		31.74	54.7781	38.0778
	31.809	6.0667	1.6333		31.809	39.7222	5.58892		31.809	50.8111	44.2444
	31.878	5.0333	1.7333		31.878	42.4337	6.33337		31.878	45.8219	50.2889
	31.947	4.4333	1.5		31.947	46.567	6.1		31.947	44.8111	53.3444
	32.016	3.7667	1.8		32.016	48.0552	4.92222		32.016	46.9226	51.6556
	32.085	3.8667	1.7		32.085	48.9892	5.25552		32.085	46.9441	50.4444
	32.154	3.4667	1.3667		32.154	50.1559	5.72219		32.154	50.1889	53.7889
	32.223	3.3667	1.4333		32.223	52.1003	5.96663		32.223	52.3	60.4333
	32.292	3.6333	1.6		32.292	57.0889	6.68889		32.292	56.8111	64.5111
	32.361	4.0667	1.3		32.361	60.633	5.8667		32.361	61.9889	67.0889
	32.43	4.7333	1.2667		32.43	54.5552	4.98892		32.43	60.3	66.1333
	32.499	6.3667	1.6		32.499	43.2663	4.03333		32.499	57.7003	63.5666
	32.568	9.4	1.5667		32.568	29.4448	3.41108		32.568	52.2778	57.9778
	32.637	12.4667	1.3		32.637	21.833	2.8667		32.637	44.4108	51.3445
	32.706	14.0667	1.2333		32.706	17	2.8333		32.706	37.0886	40.9556
	32.775	17.5667	1.6333		32.775	14.5003	2.36663		32.775	31.1441	29.2111
	32.844	19.4667	1.7333		32.844	13.5114	2.44444		32.844	30.8333	20.3333
	32.913	21.8333	1.6333		32.913	13.267	1.8667		32.913	33.9003	14.2
	32.982	19.1	1.6		32.982	14.133	2.5		32.982	41.2774	12.1111
	33.051	17	1.5667		33.051	13.767	2.5333		33.051	51.4774	9.44444
	33.12	14.8	1.3		33.12	16.067	2.9		33.12	60.0444	6.81114
	33.189	13.4333	1.7667		33.189	21.2781	3.64441		33.189	68.4774	6.34444
	33.258	11.6	2		33.258	27.7333	3.80003		33.258	76.0441	6.57781
	33.327	10.2333	2.1		33.327	27.8663	3.26663		33.327	79.3774	5.27774
	33.396	9.3667	2.1667		33.396	25.4781	2.44441		33.396	87.9997	3.79997
	33.465	8.3	2		33.465	23.5003	2.06663		33.465	94.7889	4.98889
	33.534	7.4667	2.2333		33.534	21.5333	1.63333		33.534	103.166	4.96663
	33.603	7.8	2.7667		33.603	25.5892	1.38892		33.603	110.7	5.6667
	33.672	6.5333	3.2667		33.672	30.9226	1.68886		33.672	114.856	8.05559
	33.741	5.9667	3.6		33.741	41.3774	1.17774		33.741	116.644	6.97774
	33.81	6.0667	4.8667		33.81	53.8114	1.91114		33.81	119.556	6.25559
	33.879	7	5.9		33.879	66.967	1.5		33.879	120.989	6.45559
	33.948	8	7.6		33.948	72.4448	1.71108		33.948	120.544	6.34441
	34.017	9.0333	10.7		34.017	73.2886	1.92226		34.017	120.855	5.88892
	34.086	11.4333	13.4667		34.086	72.1003	1.43333		34.086	122.689	4.38889
	34.155	14.8333	17.7		34.155	69.433	1.3333		34.155	123.022	4.08889
	34.224	18.5667	25.0667		34.224	62.1997	1.59997		34.224	120.233	3.83333
	34.293	22.0333	31.6		34.293	55.6444	1.14444		34.293	123.5	3.40003
	34.362	30.5333	41.7333		34.362	49.5889	1.35559		34.362	125.677	4.17774
	34.431	38.1	51.2333		34.431	40.7892	1.58892		34.431	125.355	2.98892
	34.5	43.3667	57.7667		34.5	30.0886	1.62226		34.5	123.689	3.88886
	34.569	46.2667	60.4333		34.569	25.1889	2.35559		34.569	117.633	5.23333
	34.638	45.1667	57.7667		34.638	24.3559	2.55559		34.638	111.256	5.48889
	34.707	41.9667	53.9667		34.707	25.2111	3.37781		34.707	99.4111	5.91111
	34.776	38	46.8		34.776	23.0997	2.99997		34.776	79.0774	8.44444
	34.845	35.6333	42.5667		34.845	21.1997	2.63337		34.845	57.4333	8.66663
	34.914	35.4667	41.1667		34.914	18.033	2.7333		34.914	43.4226	9.62226
	34.983	36.8667	43.6667		34.983	17.0774	2.54444		34.983	39.5448	11.4778
	35.052	39.1	52.2333		35.052	19.3003	3.10003		35.052	38.3111	13.1778
	35.121	47.1667	64.8333		35.121	23.6892	3.95552		35.121	38.2226	18.2889
	35.19	56.0333	71.4		35.19	28.9222	4.48892		35.19	36.6444	23.0111
	35.259	59.6333	72.6333		35.259	35.9552	4.85552		35.259	35.6219	29.4222
	35.328	57.1333	67.8		35.328	48.1448	6.14448		35.328	37.6108	38.0445
	35.397	49.7667	58.7		35.397	56.2226	7.58886		35.397	41.1111	45.2111
	35.466	41.7667	49.2667		35.466	59.7226	8.65556		35.466	42.7774	44.6777
	35.535	33.8333	39.5333		35.535	60.7781	8.74441		35.535	39.6444	42.5444
	35.604	28.3667	32.4		35.604	58.3663	7.43333		35.604	38.8889	40.7556
	35.673	22.8333	26.5		35.673	52.2778	6.24448		35.673	37.8337	38.9334
	35.742	19.6333	22.2667		35.742	42.4556	5.62226		35.742	35.4222	32.1222
	35.811	17.3	18.2667		35.811	30.9559	4.95559		35.811	32.0886	25.4889
	35.88	14.7333	15.8		35.88	23.0778	4.01108		35.88	34.7114	21.4444
	35.949	12.6333	11.7667		35.949	20.5781	4.31111		35.949	45.267	16.9
	36.018	10.9667	8.7		36.018	22.3333	5.06663		36.018	58.4444	13.2111
	36.087	8.1	7.9667		36.087	27.0886	5.82226		36.087	68.1441	11.6111
	36.156	6.7	6.0333		36.156	34.433	6.5667		36.156	77.8559	8.92219
	36.225	6.1333	4.5		36.225	42.7889	5.32219		36.225	86.6778	7.34448
	36.294	6.4333	4.7333		36.294	41.5111	5.94441		36.294	90.3556	5.92226
	36.363	5.8667	4.1333		36.363	34.0333	4.66663		36.363	95.2778	5.31108
	36.432	5.6333	3.4		36.432	24.5781	3.37781		36.432	98.167	5.0667
	36.501	5.7667	3.3667		36.501	18.1559	2.75559		36.501	101.144	4.91111
	36.57	5.4667	3.7		36.57	15.1997	2.63337		36.57	99.2108	4.31108
	36.639	6.5	4.1667		36.639	12.5997	1.86667		36.639	96.233	4.2667
	36.708	6.4667	3.9		36.708	11.1889	1.75559		36.708	93.2559	3.12219
	36.777	7	4.7333		36.777	11.7444	2.01114		36.777	86.4337	3.36667
	36.846	7.6667	4.9333		36.846	12.4892	2.18892		36.846	80.5886	3.68886
	36.915	7.4	5.5		36.915	12.5781	2.34441		36.915	71.1444	3.21114
	36.984	8.6333	7.8667		36.984	13.2333	2.16663		36.984	60.4552	2.28892
	37.053	10.2333	9.7333		37.053	13.5889	2.18889		37.053	49.0448	2.74448
	37.122	12.0333	12.6333		37.122	15.6663	2.06663		37.122	34.9997	3.39997
	37.191	15	15.8		37.191	21.3892	2.48892		37.191	22.133	2.3667
	37.26	18.8	22.2333		37.26	26.9552	2.78892		37.26	15.8003	2.00003
	37.329	23.4667	29.9667		37.329	35.1441	3.34441		37.329	11.667	3
	37.398	29.4333	39.5		37.398	46.4448	3.81108		37.398	8.64444	3.74444
	37.467	37.1333	48.0667		37.467	61.4111	4.24441		37.467	6.27744	3.24444
	37.536	42.0333	57		37.536	75.7667	4.16667		37.536	6.45522	3.48892
	37.605	46.4333	64.8667		37.605	80.1219	4.42219		37.605	5.6	3.1667
	37.674	50.9	69.6		37.674	85.7889	4.68889		37.674	5.05589	2.98889
	37.743	54.5667	70.1333		37.743	84.9222	6.02222		37.743	4.99967	2.16667
	37.812	55.1	68		37.812	76.1226	5.55556		37.812	4.25589	1.98889
	37.881	52.4333	65.7333		37.881	63.467	5.4667		37.881	6.38922	3.62222
	37.95	50.9667	68		37.95	53.0108	5.11108		37.95	7.85522	3.72222
	38.019	50.6333	69.5		38.019	42.0003	4.76663		38.019	7.8	3
	38.088	51.4	69.4333		38.088	38.1441	5.44441		38.088	8.00033	3.03333
	38.157	52.3667	66.3667		38.157	35.7556	5.25556		38.157	8.3	2.8667
	38.226	50.0667	61.9333		38.226	35.0556	4.65556		38.226	9.45522	2.12222
	38.295	46.3333	57.9		38.295	34.8444	4.84444		38.295	10.0892	1.98892
	38.364	43.3333	52.4333		38.364	39.0448	6.17778		38.364	9.46633	1.53333
	38.433	38.7333	46.9		38.433	48.967	6.7333		38.433	9.14411	2.87781
	38.502	35.1	40.0667		38.502	58.0774	7.87774		38.502	9.15556	3.02226
	38.571	31.9333	35.7333		38.571	65.6781	8.64441		38.571	10.3559	2.55559
	38.64	26.5333	28.6		38.64	67.7997	9.66667		38.64	9.30033	2.40003
	38.709	21.8	24.8667		38.709	65.9556	9.62226		38.709	10.5886	2.78886
	38.778	19.5333	22.4667		38.778	63.7222	8.62222		38.778	10.5448	2.91108
	38.847	19.7333	21.9333		38.847	57.8448	7.04448		38.847	9.72189	2.52219
	38.916	19.5	21.7		38.916	45.1774	5.61114		38.916	8.633	3.3
	38.985	18.8	21.8		38.985	33.5556	4.02226		38.985	7.28856	4.02226
	39.054	18.4	20.3667		39.054	20.7886	3.15556		39.054	5.75556	3.98886
	39.123	15.7667	16		39.123	15.9552	2.48892		39.123	5.667	4.0333
	39.192	13	11.9667		39.192	13.9559	2.55559		39.192	5.133	3.8667
	39.261	10.5333	8.5667		39.261	11.667	1.9		39.261	4.47811	4.11111
	39.33	7.6667	6.9667		39.33	10.3111	1.37781		39.33	4.667	3.4667
	39.399	7.3333	5.4333		39.399	10.6222	1.48892		39.399	5.28889	2.55559
	39.468	6.7667	4.5333		39.468	12.5226	1.52226		39.468	6.05522	2.48892
	39.537	6.4333	4.4333		39.537	14.2222	1.65552		39.537	6.15522	2.65552
	39.606	5.8333	4.6333		39.606	17.8448	1.31108		39.606	6.81078	2.27778
	39.675	6.0667	5.6667		39.675	22.133	1.6333		39.675	6.84411	2.41111
	39.744	6.3333	5.9667		39.744	30.4108	1.74448		39.744	7.42222	3.35552
	39.813	6.8	6.7333		39.813	40.7889	1.55559		39.813	9.03333	3.83333
	39.882	7.6	7.4333		39.882	52.6892	2.02222		39.882	12.9111	4.44441
	39.951	7.4	7.4		39.951	62.3556	2.25556		39.951	15.0444	3.94444
	40.02	6.4667	6.6667		40.02	70.5444	2.17774		40.02	18.267	2.8
	40.089	5.9667	5.5667		40.089	75.1889	2.45559		40.089	22.6108	3.11108
	40.158	5.0667	4		40.158	76.0111	2.84441		40.158	29.4226	2.38886
	40.227	5	3.5333		40.227	81.6219	3.95559		40.227	42.1886	1.65556
	40.296	5.4333	4.2667		40.296	85.1778	6.17778		40.296	65.2444	3.57774
	40.365	5.1667	3.7		40.365	95.3556	7.62226		40.365	85.3663	2.93333
	40.434	4.5333	3.5667		40.434	111.511	11.2111		40.434	101.033	2.9333
	40.503	4.6667	3.1333		40.503	116.878	15.2445		40.503	114.389	2.98886
	40.572	5	3.2333		40.572	114.434	17.1334		40.572	121.622	3.65552
	40.641	5.1667	4.3667		40.641	112.478	21.5445		40.641	127.1	2.6333
	40.71	6.0667	4.4667		40.71	110.178	19.8778		40.71	129.533	2.7
	40.779	6.6333	4.3667		40.779	107.3	17.7667		40.779	131.256	3.42219
	40.848	6.1	4.3		40.848	107.677	17.3444		40.848	134.811	2.27781
	40.917	6.6667	5.0333		40.917	101.323	18.7223		40.917	135.5	2.30003
	40.986	6.4667	6.2		40.986	97.633	17.5		40.986	135.555	3.62222
	41.055	6.6333	6.7		41.055	94.567	18.1333		41.055	134.7	2.59997
	41.124	8.2	7.2		41.124	95.8	18.5		41.124	130.745	3.31108
	41.193	9.3	7.6333		41.193	98.0226	17.9889		41.193	127.889	3.75552
	41.262	9.9333	8.6333		41.262	98.1	15		41.262	125.167	1.9
	41.331	10.7	9.0667		41.331	103.067	16.6333		41.331	117.133	2.6
	41.4	12.6	8.3		41.4	106.478	17.6445		41.4	111.556	2.12219
	41.469	13.0333	8.0333		41.469	108.044	17.7777		41.469	102.511	3.27781
	41.538	15.1667	9.2333		41.538	110.355	18.4222		41.538	89.3448	3.34448
	41.607	18.2667	9.7		41.607	108.256	18.5222		41.607	72.467	3.1667
	41.676	20.4667	11.0333		41.676	106.022	18.4555		41.676	50.2663	3.80003
	41.745	18.8	12.3333		41.745	97.9222	18.5222		41.745	33.2003	3.93333
	41.814	14.6667	12.6		41.814	93.8114	18.3111		41.814	24.133	3.3
	41.883	13	11.6333		41.883	94.8559	18.0889		41.883	18.9108	3.81108
	41.952	11.9667	10.7667		41.952	93.5108	13.9778		41.952	16.4889	2.82219
	42.021	9.6333	8.9667		42.021	87.8892	12.6555		42.021	12.4219	3.28889
	42.09	8.7	7.6		42.09	87.7448	9.57778		42.09	11.4448	4.94448
	42.159	7.4	6.6		42.159	83.3337	6.53337		42.159	10.1219	2.88889
	42.228	5.8	5.4		42.228	71.8997	5.23337		42.228	9.57744	3.34444
	42.297	5.8667	5.5333		42.297	70.1333	2.96663		42.297	9.46667	3.83337
	42.366	6.4	6.2333		42.366	63.633	2.3667		42.366	7.65589	3.72219
	42.435	7.2	7.6		42.435	59.8559	2.32219		42.435	8.7	3.5333
	42.504	7.9667	9.7		42.504	46.7778	1.71108		42.504	9	5
	42.573	10.8667	13.3		42.573	40.4222	0.955522		42.573	7.22256	5.88886
	42.642	12.5667	19.3		42.642	31.4441	0.944411		42.642	7.98889	5.65559
	42.711	18.3	26.1333		42.711	23.7003	1.00003		42.711	9.11144	6.87774
	42.78	24.8667	33.8667		42.78	20.2552	0.622222		42.78	9.72189	8.48889
	42.849	31.4	41.8667		42.849	18.0337	0.999967		42.849	12.2333	11.6
	42.918	41.5	54.8		42.918	14.8997	0.833367		42.918	16.3556	14.5556
	42.987	50.6667	64.1333		42.987	12.4003	1.03333		42.987	19.5111	17.3444
	43.056	55.4	66.8667		43.056	11.2781	0.877811		43.056	24.3114	22.7111
	43.125	57.6333	68.7667		43.125	9.51078	1.07778		43.125	28.3111	25.3111
	43.194	59.8667	70.7333		43.194	9.01144	1.04444		43.194	30.4222	28.5555
	43.263	62.1	71.9667		43.263	11.0997	1.19997		43.263	34.6892	32.6555
	43.332	62.5	73.1		43.332	12.0667	0.933367		43.332	43.4667	35.8334
	43.401	62.4333	73.4333		43.401	11.4337	0.499967		43.401	52.433	38.2667
	43.47	62.2	75.3333		43.47	10.1559	1.18889		43.47	58.1	40.5
	43.539	63.2	76.1333		43.539	7.14478	0.911078		43.539	64.2	42.6333
	43.608	62.8667	75.7667		43.608	8.61144	1.27774		43.608	70.0108	44.5445
	43.677	63.1667	74.0667		43.677	7.9	0.4		43.677	71.6559	36.9222
	43.746	58.8667	69.0667		43.746	7.25589	0.888889		43.746	71.6111	32.2444
	43.815	50.8667	64.0667		43.815	6.04444	0.277744		43.815	75.6997	26.0334
	43.884	49.4333	67.9		43.884	7.1	1.3333		43.884	83.5889	20.1556
	43.953	54.9	76.9333		43.953	8.41144	1.67774		43.953	90.067	17.9667
	44.022	73.5333	86.4333		44.022	8.47811	0.811111		44.022	94.1556	14.8889
	44.091	82.2	92.2333		44.091	10.1222	0.855522		44.091	101.923	10.1223
	44.16	83.5333	93.5333		44.16	10	1.2333		44.16	107.344	9.04441
	44.229	85.9	94.3333		44.229	12.3448	1.24448		44.229	110.411	7.41111
	44.298	88.4	94.6		44.298	16.5781	0.844411		44.298	111.544	7.47781
	44.367	88.3333	93.9		44.367	18.8448	1.24448		44.367	111.755	7.15552
	44.436	86.4	90.9333		44.436	23.9108	1.37778		44.436	111.056	7.62226
	44.505	83.4333	87.2667		44.505	31.8556	2.05556		44.505	108.2	6.19997
	44.574	75.3333	80.4333		44.574	36.7219	1.92219		44.574	103.156	5.18886
	44.643	62.3667	65.5		44.643	40.7448	1.71108		44.643	98.5556	4.35556
	44.712	47.3667	50.3333		44.712	39.9337	2.89997		44.712	86.8222	4.22222
	44.781	39.1667	37.3667		44.781	42.4222	3.62222		44.781	74.3	3.7333
	44.85	27.7	27.8667		44.85	46.3114	5.04444		44.85	57.9667	4.13337
	44.919	19.8667	22		44.919	53.1003	6.46663		44.919	41.4444	2.31114
	44.988	16.3	16.4333		44.988	63.7	9.6667		44.988	28.4219	3.62219
	45.057	14.0333	11.7667		45.057	73.5	11.1667		45.057	19.2111	2.24441
	45.126	10.7	9.6333		45.126	81.0778	13.5445		45.126	14.7219	3.18889
	45.195	9.2	7.6333		45.195	88.6448	15.9445		45.195	11.633	3.9333
	45.264	8.7333	6.3333		45.264	99.6886	18.6223		45.264	9.933	4.3333
	45.333	8.8	4.9667		45.333	99.7337	18.7		45.333	8.37744	2.57774
	45.402	7.9333	3.6		45.402	104.233	21.8333		45.402	7.76633	1.90003
	45.471	6.5333	3.3333		45.471	101.4	21.1333		45.471	8.52222	2.38892
	45.54	6.3667	3.3333		45.54	101.344	20.2444		45.54	7.967	2.6667
	45.609	6.8333	2.8667		45.609	97.5556	19.0889		45.609	7.10033	2.76663
	45.678	5.1333	2.5667		45.678	99.1003	18.9333		45.678	7.51078	2.81108
	45.747	4.9	2.9333		45.747	91.3222	15.4555		45.747	6.78889	5.28889
	45.816	4.8667	2.1667		45.816	88.9111	15.1111		45.816	8.18889	6.38889
	45.885	5.5667	2.0667		45.885	84.3226	12.3556		45.885	9.25522	5.12222
	45.954	4.5667	2.6667		45.954	78.5003	9.06663		45.954	11.8	5.2667
	46.023	4.3667	3.1		46.023	70.6997	8.93337		46.023	11.2226	5.42226
	46.092	4.9333	3.1667		46.092	65.8886	7.88886		46.092	11.3226	5.65556
	46.161	5.8333	4		46.161	54.833	6.1667		46.161	15.3774	5.21114
	46.23	6.4	5.6		46.23	52.167	6.2		46.23	18.2559	4.72219
	46.299	7.7	6.9667		46.299	43.5448	5.44448		46.299	21.2552	5.55552
	46.368	8.1333	6.9667		46.368	36.6108	5.27778		46.368	29.8559	6.22219
	46.437	7.9333	6.5333		46.437	31	3.7667		46.437	35.8781	6.04441
	46.506	7.0333	6		46.506	26.1003	3.70003		46.506	42.4108	6.01108
	46.575	6.6333	5.1		46.575	30.6108	4.27778		46.575	51.8441	4.34441
	46.644	6.6	4.1333		46.644	40.3441	4.57781		46.644	53.7	3.9333
	46.713	6.2	3.8667		46.713	57.4	5.1		46.713	60.7219	4.08889
	46.782	5.6333	4.9		46.782	73.2219	4.92219		46.782	65.6337	2.96667
	46.851	5.5667	4.8667		46.851	89.4778	4.67778		46.851	73.8111	3.57781
	46.92	5.7	4.7333		46.92	102.545	5.71108		46.92	84.1667	3.46667
	46.989	5.3333	5.5333		46.989	94.2111	3.74441		46.989	89.6552	4.42222
	47.058	5.1333	3.6		47.058	87.4556	2.72226		47.058	96.6559	3.78889
	47.127	4.2333	2.8667		47.127	78.4556	2.58886		47.127	101.689	2.68889
	47.196	3.9333	2.6667		47.196	55.833	1.7667		47.196	102.745	3.64448
	47.265	3.7667	2.9333		47.265	41.8997	1.76667		47.265	103.089	4.78886
	47.334	4.2333	3.8		47.334	34.7108	1.57778		47.334	99.7667	3.89997
	47.403	4.6333	4.3667		47.403	26.7108	0.811078		47.403	94.7778	4.94448
	47.472	4.5333	5.3		47.472	21.0997	1.56667		47.472	88.2556	5.88886
	47.541	6.3	6.5667		47.541	17.9889	1.62219		47.541	75.6778	5.21108
	47.61	7.6333	8.1667		47.61	16.1003	1.10003		47.61	62.7108	5.97778
	47.679	8.5667	9.6667		47.679	13.433	1.1667		47.679	52.7	8.3
	47.748	10.1	13.8333		47.748	12.9441	0.977811		47.748	43.1226	9.35556
	47.817	13.6	18.4333		47.817	11.2444	1.17774		47.817	41.0111	11.7778
	47.886	18.1667	27.3667		47.886	8.31078	1.07778		47.886	36.3114	14.3444
	47.955	24.2333	33.3667		47.955	8.23367	0.699967		47.955	38.6663	19.2666
	48.024	30	42.2		48.024	6.55589	0.288889		48.024	41.5997	22.7
	48.093	34.7333	46.1		48.093	6.84444	0.511144		48.093	43.5774	27.7111
	48.162	33.7667	45.5		48.162	6.467	0.6333		48.162	47.6559	37.6556
	48.231	31.4	40.2		48.231	6.99967	1.36667		48.231	54.9222	47.2555
	48.3	29.4333	38.0333		48.3	6.933	0.6		48.3	67.6111	58.8444
	48.369	31.1	41.4333		48.369	7.15589	0.788889		48.369	74.8333	68.5666
	48.438	33	49.1		48.438	6.62256	0.555556		48.438	79.3781	75.3444
	48.507	39.2	55.3333		48.507	6.53333	0.666633		48.507	80.9997	79.1
	48.576	46.7333	63.1667		48.576	6.48922	0.788922		48.576	83.0441	81.8444
	48.645	54.3333	68.1667		48.645	6.133	0.4333		48.645	81.4441	80.9778
	48.714	54.5	66.9333		48.714	6.63367	0.833367		48.714	80.433	81.2667
	48.783	56.4	68		48.783	6.81144	0.944444		48.783	76.0781	82.3778
	48.852	55.1667	65.6		48.852	6.41144	0.711144		48.852	75.267	76.7
	48.921	50.4333	58.5		48.921	6.60033	0.666633		48.921	68.7333	71.3
	48.99	39.2333	45.8667		48.99	6.95589	0.988889		48.99	69.2	74
	49.059	27.8667	34		49.059	7.24444	0.511144		49.059	68.5889	70.4222
	49.128	19.7	22.3667		49.128	7.58856	0.188856		49.128	68.9556	68.8889
	49.197	16.6667	15.2333		49.197	8.13367	0.933367		49.197	68.7774	65.0444
	49.266	12.4	9.9333		49.266	8.33333	0.100033		49.266	68.5226	65.0556
	49.335	8.2667	7.5333		49.335	10.1559	0.288889		49.335	75.3219	73.0889
	49.404	8.0333	5.6333		49.404	11.2778	0.877778		49.404	77.3219	75.6556
	49.473	8.3	4.8333		49.473	14.2222	0.755522		49.473	82.4222	78.1889
	49.542	8.0333	3.8667		49.542	19.9889	0.722189		49.542	81.6444	84.0444
	49.611	7.3	3.4		49.611	23.133	0.6		49.611	78.7222	81.6889
	49.68	6.8	2.7667		49.68	29.3114	0.211144		49.68	74.0448	77.9445
	49.749	7.4333	2.4667		49.749	38.1	0.4667		49.749	69.0333	72.7666
	49.818	7.2	2.9		49.818	43.6892	0.655522		49.818	64.0219	64.9556
	49.887	7.0333	2.7333		49.887	56.3552	0.622222		49.887	52.8337	59.7334
	49.956	7.7333	3.5		49.956	58.2	0.6		49.956	44.4444	50.5111
	50.025	7.4	3.8		50.025	60.8552	1.25552		50.025	37.0889	39.7556
	50.094	7.2333	4.1		50.094	56.1997	1.69997		50.094	23.0219	33.5222
	50.163	6.9	4.5		50.163	46.8778	1.04448		50.163	17.3781	26.9778
	50.232	8.4667	6.2667		50.232	39.1441	1.34441		50.232	9.84411	17.2778
	50.301	8.5333	8.6667		50.301	31.4226	1.62226		50.301	7.91111	14.2778
	50.37	9.4333	10.8667		50.37	27.2889	2.02219		50.37	7.27811	13.2111
	50.439	11.3667	14.6667		50.439	29.2774	2.61114		50.439	7.95589	11.9222
	50.508	15	20.8667		50.508	31.0889	4.42219		50.508	6.11144	9.21114
	50.577	18.8	27.3333		50.577	36.8997	5.73337		50.577	7.32189	7.22219
	50.646	21.9	33.1333		50.646	45.5448	7.27778		50.646	6.93367	6.63337
	50.715	27.2333	39.4333		50.715	51.2444	7.67774		50.715	6.333	6.4
	50.784	31.2667	48.2667		50.784	52.8781	8.04441		50.784	6.88922	8.72222
	50.853	35.7	53.2667		50.853	53.6559	5.95559		50.853	8.53367	7.29997
	50.922	40.4333	55.9667		50.922	43.833	6.2		50.922	13.1552	9.38892
	50.991	42.3	53.8667		50.991	41.9441	5.24441		50.991	19.0774	13.0444
	51.06	41.6	52.6		51.06	42.8552	6.38892		51.06	23.9222	15.4889
	51.129	40.1667	51.6667		51.129	51.4003	7.53333		51.129	28.5	24.1333
	51.198	37.8	45.1333		51.198	65.8444	11.0777		51.198	30.2111	27.8778
	51.267	34.7	40.7667		51.267	99.1333	17.1333		51.267	29.5226	29.6223
	51.336	30.2	34.9		51.336	111.489	21.4889		51.336	25.2108	27.7111
	51.405	22.0667	25.6		51.405	121.333	27.4666		51.405	20.7774	24.8111
	51.474	18.5	20.7		51.474	125.455	38.0222		51.474	15.6219	19.2889
	51.543	16.7333	18.5333		51.543	128.577	39.2777		51.543	11.0108	13.2778
	51.612	14.9	19.6667		51.612	130.534	39.7334		51.612	10.8	10.7
	51.681	15.8667	18.7667		51.681	131.711	40.1111		51.681	9.27778	8.77778
	51.75	16.5667	22.3		51.75	132.511	35.5778		51.75	7.81078	8.81108
	51.819	19.1333	28		51.819	128.756	30.5889		51.819	6.12222	8.32222
	51.888	27.6	38.9		51.888	125.578	27.0111		51.888	5.25589	7.78889
	51.957	38.4333	52.9333		51.957	125.1	23.7667		51.957	4.82189	4.52219
	52.026	49.1667	64.3333		52.026	118.7	23.6333		52.026	5.56633	6.50003
	52.095	58.1333	69.9		52.095	113.323	22.2223		52.095	5.54444	4.97774
	52.164	60.4667	72.8333		52.164	112.3	18.0333		52.164	6.28856	5.78886
	52.233	64.1333	71.9667		52.233	108.045	17.0778		52.233	5.79967	4.79997
	52.302	68.4	75.5333		52.302	102.767	15		52.302	5.94478	5.01108
	52.371	70.9	74.4		52.371	95.1997	13.6667		52.371	6.23367	4.96667
	52.44	71.1	76.3		52.44	80.6226	10.2889		52.44	7.88922	3.78892
	52.509	67.4	75.0667		52.509	68.0667	7.06667		52.509	11.0552	4.22222
	52.578	65.5667	72.3		52.578	51.5444	4.87774		52.578	15.1448	2.77778
	52.647	64.1	67.6667		52.647	36.4997	3.13337		52.647	19.6448	2.44448
	52.716	58.1667	64.0333		52.716	21.5997	2.79997		52.716	25.5219	3.98889
	52.785	52.0667	57.9		52.785	17.3226	3.08886		52.785	36.9774	2.51114
	52.854	45.1	48.9		52.854	14.3886	1.22226		52.854	49.3441	2.87781
	52.923	38.5333	41.6		52.923	12.2663	1.03333		52.923	63.9226	2.92226
	52.992	31.0667	35.3333		52.992	9.98889	1.15559		52.992	70.2222	3.15552
	53.061	25.7	27.4		53.061	8.18922	1.08892		53.061	77.3219	2.75559
	53.13	21.5	22.5667		53.13	7.07744	0.711144		53.13	80.2111	4.37781
	53.199	17	17.0333		53.199	8.11144	0.877744		53.199	90.7889	4.58889
	53.268	14.6333	13		53.268	8.27811	0.311111		53.268	100.711	4.47781
	53.337	12.6667	9.8667		53.337	7.65589	0.688889		53.337	104.8	5.43333
	53.406	9.9333	7.1667		53.406	6.57811	0.777811		53.406	109.7	6.13333
	53.475	8.5667	6.1667		53.475	6.633	1.1333		53.475	111.089	5.35559
	53.544	7.1333	5.1		53.544	7.02222	1.55552		53.544	114.533	8.93333
	53.613	5.9667	5		53.613	7.33333	0.800033		53.613	114.544	10.7111
	53.682	4.9667	4.4333		53.682	6.46633	1.10003		53.682	114.622	14.4555
	53.751	4.9333	4.7333		53.751	7.75589	0.888889		53.751	115.1	18.8333
	53.82	5.5333	5.5667		53.82	7.45556	0.888856		53.82	112.334	21.8334
	53.889	6.9	7.1667		53.889	6.97811	0.777811		53.889	104.756	23.6556
	53.958	7.2	8.8333		53.958	7.02222	0.888922		53.958	95.4889	23.3556
	54.027	9.5	11.2667		54.027	7.67811	1.31111		54.027	83.8441	22.0778
	54.096	11.5333	16.3		54.096	8.1	0.7333		54.096	70.0441	18.8111
	54.165	13.9667	22.1333		54.165	9.64478	0.844478		54.165	51.2886	14.9556
	54.234	18.9	27.9333		54.234	10.1333	1.23333		54.234	35.6997	14.5334
	54.303	25.7667	34.7667		54.303	9.67744	2.51114		54.303	26.167	12.1
	54.372	33.3667	44.0667		54.372	12.4114	1.77774		54.372	23.0774	7.87774
	54.441	37.7667	52.2		54.441	16.1886	2.88886		54.441	18.7552	7.05552
	54.51	41.4	53.1		54.51	21.4337	3.29997		54.51	17.5219	6.25559
	54.579	42.5	49.3667		54.579	25.1552	3.62222		54.579	16.8778	5.77778
	54.648	39.8	45.0667		54.648	25.367	1.8333		54.648	20.7226	6.48886
	54.717	35.6	39.1333		54.717	19.667	2.2667		54.717	24.0333	5.93333
	54.786	30.6	35.4667		54.786	15.467	2.2		54.786	32.9003	5.13333
	54.855	26.9667	32.3		54.855	13.2	1.8333		54.855	42.9667	3.56667
	54.924	22.7333	30.3667		54.924	12.4774	2.24444		54.924	61.1559	5.25559
	54.993	20.2	28.1333		54.993	16.1448	1.77778		54.993	70.4552	4.72222
	55.062	17.4333	24.9333		55.062	17.167	3		55.062	78.9886	6.62226
	55.131	15.3	20.3333		55.131	21.6337	3.89997		55.131	86.2337	6.56667
	55.2	13.1667	16.1667		55.2	28.9	4.9667		55.2	90.6	6.3667
	55.269	11.4	11.7		55.269	40.2667	6.23337		55.269	92.4444	7.64444
	55.338	10	9.5667		55.338	55.9778	6.34448		55.338	91.6448	8.44448
	55.407	8.4	7.9		55.407	75.0003	8.63333		55.407	90.7448	9.77778
	55.476	8.2667	7		55.476	89.2774	9.51114		55.476	84.4774	12.3111
	55.545	7.9333	6.9333		55.545	101.6	11.6		55.545	82.4444	16.0444
	55.614	6.8	5.7		55.614	101.733	13.8667		55.614	70.9556	22.4556
	55.683	6.7667	4.6667		55.683	99.4114	15.2111		55.683	63.7441	33.3444
	55.752	6.9667	4.3667		55.752	93.4444	16.3777		55.752	63.633	43.3
	55.821	6.4	3.6		55.821	87.9552	12.8555		55.821	67.2337	58.4334
	55.89	5.8333	3.1667		55.89	81.3781	13.1111		55.89	68.0114	59.9777
	55.959	6	3.1667		55.959	75.4441	10.6111		55.959	68.4219	63.4222
	56.028	5.3	3.5333		56.028	68.8552	8.45552		56.028	67.6886	64.4889
	56.097	4.9	3.6333		56.097	55.0892	4.55552		56.097	68.3559	65.4889
	56.166	5	3.7667		56.166	33.7886	3.12226		56.166	61.1774	58.7444
	56.235	5.2333	5.1333		56.235	20.8333	2.70003		56.235	56.9337	57.5
	56.304	7.0667	6.8333		56.304	15.867	1.8333		56.304	54.3441	55.1444
	56.373	7.8	9.6667		56.373	12.9114	1.51114		56.373	49.267	46.9667
	56.442	8.8667	14.1333		56.442	11.0559	1.35559		56.442	44.3	39.6667
	56.511	13.8333	21.6		56.511	9.54411	1.04441		56.511	36.8003	37.6
	56.58	18.6333	29.5667		56.58	8.7	0.7333		56.58	30.0663	27.5333
	56.649	25.9	36.2		56.649	8.57744	1.11114		56.649	22.4108	22.8445
	56.718	32.3667	40.0667		56.718	9.12256	1.02226		56.718	16.9774	15.9444
	56.787	37.4333	44.2		56.787	10.133	0.9333		56.787	12.8	13.9667
	56.856	43.2667	50.1		56.856	10.9108	1.24448		56.856	13.8222	11.4555
	56.925	44.2667	58.6333		56.925	10.0559	1.18889		56.925	15.6774	9.31114
	56.994	50.2333	60.7333		56.994	12.6997	1.73337		56.994	21.9114	8.74444
	57.063	54.3667	64.2		57.063	14.8222	2.02222		57.063	30.7226	6.28886
	57.132	57.7	70.8		57.132	17.1111	2.01111		57.132	42.9663	5.90003
	57.201	60.6	74.6		57.201	21.7003	1.90003		57.201	52.4	5
	57.27	64.9	77.2667		57.27	30.8003	2.63333		57.27	56.1441	3.57781
	57.339	71.4	81.3		57.339	42.2114	4.14444		57.339	55.4337	5.06667
	57.408	73.1	82.2333		57.408	55.4	5.0667		57.408	50.7222	2.85552
	57.477	74.9667	85.1667		57.477	69.5226	6.82226		57.477	44.5003	4.80003
	57.546	77.4333	85.9667		57.546	78.9781	7.21111		57.546	32.067	4.1
	57.615	77.5667	85.4		57.615	88.5222	10.5889		57.615	21.9781	2.14441
	57.684	76.1	82.8333		57.684	95.3219	11.6556		57.684	20.0559	3.38889
	57.753	73.5	77.2667		57.753	97.233	14.6333		57.753	21.3114	4.57774
	57.822	69.2333	73.3667		57.822	98.4226	17.9223		57.822	25.5556	4.52226
	57.891	60.8	63.5		57.891	104.866	23.1333		57.891	33.0892	2.88892
	57.96	44.8333	50.7667		57.96	110.955	27.1555		57.96	46.9552	3.45552
	58.029	32.8	37.0667		58.029	116.422	26.4556		58.029	68.2448	4.04448
	58.098	27.0333	29.7		58.098	122.045	28.1111		58.098	79.9003	3.93333
	58.167	21.3	23.4333		58.167	125.9	24.7		58.167	88.8559	3.45559
	58.236	18.0667	17.7		58.236	125.044	24.1777		58.236	99.3219	2.82219
	58.305	14.3333	13.8		58.305	122.756	21.8223		58.305	105.822	2.25559
	58.374	10.6333	9.7667		58.374	116.633	20.2333		58.374	112.122	3.42222
	58.443	10.3333	7.3		58.443	113.934	21.9667		58.443	116.189	2.38892
	58.512	7.6333	5.7		58.512	119.723	21.8889		58.512	120.234	2.59997
	58.581	6.7333	4.8667		58.581	122.045	24.9778		58.581	123.423	2.15556
	58.65	6.6	4.6667		58.65	124.223	31.8556		58.65	127	3.9
	58.719	6.0333	4.4		58.719	129.123	36.4223		58.719	127.545	3.91108
	58.788	6.6	3.9667		58.788	134.278	42.6778		58.788	123.522	4.38892
	58.857	7.1	3.7667		58.857	136.977	43.3777		58.857	121.234	3.86667
	58.926	7.1667	4.6		58.926	136.211	42.6111		58.926	122.6	4.46667
	58.995	7.4	5.0333		58.995	137.066	41.4333		58.995	115.878	4.34448
	59.064	7.6333	7.0333		59.064	135.489	34.8223		59.064	112.666	4.13333
	59.133	8.2	9		59.133	128.911	25.9444		59.133	107.256	2.88889
	59.202	8.8667	11.2333		59.202	120.723	20.8889		59.202	99.3774	3.81114
	59.271	9.8	13.6667		59.271	113.689	13.9222		59.271	92.0222	3.12222
	59.34	11.0333	16.9		59.34	100.3	9.1667		59.34	91.6222	4.02222
	59.409	13.4	19.9667		59.409	82.9003	6.96663		59.409	89.3559	2.55559
	59.478	17.3	21.7333		59.478	55.8892	5.32222		59.478	86.3552	2.78892
	59.547	16.9	22.8333		59.547	38.6886	4.05556		59.547	85.3892	3.22222
	59.616	16.9	23.5		59.616	29.5003	3.73333		59.616	85.6111	2.77781
	59.685	18.4667	29.4667		59.685	22.6337	2.43337		59.685	83.433	3.1667
	59.754	21.8667	35.7		59.754	17.1003	2.40003		59.754	85.6	1.7667
	59.823	27.4333	47.5667		59.823	15.5559	2.35559		59.823	86.433	1.0667
	59.892	33.1333	53.4333		59.892	13.3556	1.98886		59.892	91.1111	3.57781
	59.961	34.3667	58.9333		59.961	12.2886	1.42226		59.961	92.6222	4.28892
	60.03	37.2333	55.9		60.03	10.4219	0.922189		60.03	96.6892	3.65552
	60.099	36.6667	44.0667		60.099	8.87778	0.844478		60.099	99.133	3.1667
	60.168	28.4333	29		60.168	8.58889	0.455589		60.168	101.066	3.90003
	60.237	18.6	19.0333		60.237	9.44411	1.01111		60.237	96.7333	3.23333
	60.306	13.6333	14.0667		60.306	9.27744	0.811144		60.306	99.3222	3.35552
	60.375	10.3667	11.2667		60.375	9.31078	1.17778		60.375	95.5226	4.38886
	60.444	8.9	10.1333		60.444	9.73333	1.23333		60.444	93.1889	3.72219
	60.513	8.8667	7.7333		60.513	8.833	0.7333		60.513	88.2114	3.07774
	60.582	7.4333	8		60.582	7.97744	0.877744		60.582	83.2226	3.12226
	60.651	5.9333	6.0333		60.651	8.50033	0.700033		60.651	76.5333	1.56663
	60.72	6	4.7		60.72	8.03367	0.733367		60.72	71.2663	1.93333
	60.789	6.6667	5.8333		60.789	7.08856	0.988856		60.789	62.0111	2.07781
	60.858	6.1667	5.5		60.858	7.20033	1.53333		60.858	48.6886	2.85556
	60.927	7.4667	7.5333		60.927	6.68856	1.05556		60.927	31.2552	1.75552
	60.996	7.2	8.4667		60.996	7.20033	0.800033		60.996	20.167	3.9667
	61.065	7.8667	10.4333		61.065	7.63333	1.16663		61.065	16.3337	3.09997
	61.134	8.9	11.8		61.134	8.44444	0.777744		61.134	12.3556	3.02226
	61.203	8.7333	10.4667		61.203	8.16667	0.966667		61.203	10.4552	3.52222
	61.272	8.7	11.0667		61.272	8.71078	0.977778		61.272	8.8	3.1667
	61.341	11.1667	13.6		61.341	9.70033	1.66663		61.341	7.98922	2.58892
	61.41	12.9667	18.6333		61.41	11.1111	1.64441		61.41	6.36633	2.43333
	61.479	16.2667	24.1667		61.479	11.6886	2.45556		61.479	4.70033	2.00003
	61.548	21.1	33.2333		61.548	14.2886	2.75556		61.548	4.82222	2.98892
	61.617	27.9	42.2		61.617	17.4663	3.40003		61.617	6.44478	3.77778
	61.686	31.8	48.5		61.686	21.5333	5.13333		61.686	5.93333	5.03333
	61.755	36.6	55.7667		61.755	27.5556	7.18886		61.755	5.84444	3.61114
	61.824	43.2333	63.3333		61.824	43.6663	9.73333		61.824	4.94444	4.04444
	61.893	47.4667	65.5333		61.893	63.1337	11.1334		61.893	4.76633	2.90003
	61.962	51.3	65.7667		61.962	76.2556	16.8556		61.962	5.71144	5.01114
	62.031	53.2333	65.5333		62.031	86.2441	23.4111		62.031	6.64444	7.14444
	62.1	51.6	67.5667		62.1	93.8114	26.0111		62.1	6.35589	5.35559
	62.169	50.4667	66.4667		62.169	97.4	25.7333		62.169	6.67744	5.07774
	62.238	50.1667	62.5		62.238	100.378	26.6778		62.238	8.02189	6.95559
	62.307	47	50.9667		62.307	102.789	22.1556		62.307	8.267	6.5667
	62.376	37.8333	40.8333		62.376	98.6226	20.4889		62.376	6.38856	6.45556
	62.445	34.3667	38.5333		62.445	91.5781	13.7444		62.445	7.76667	7.26667
	62.514	37.2667	42.7333		62.514	77.5559	10.2889		62.514	8.77778	7.67778
	62.583	39.4333	56.6333		62.583	58.7774	7.87774		62.583	10.5441	10.9444
	62.652	45.7667	71.3333		62.652	38.3003	5.10003		62.652	14.367	11.6
	62.721	62.0667	80.2333		62.721	26.033	3.7333		62.721	15.1559	17.1222
	62.79	70.5	83.3333		62.79	21.1892	3.65552		62.79	20.0781	18.0111
	62.859	71.2	82.3667		62.859	17.6444	3.11114		62.859	21.8444	18.7777
	62.928	69.8333	82.0333		62.928	17.1552	2.62222		62.928	24.2552	23.6222
	62.997	70.0333	78.7		62.997	18.3333	2.40003		62.997	29.3997	26.9667
	63.066	65.9667	76.6		63.066	18.9	3.7		63.066	33.4997	25.7
	63.135	63.3333	74.3		63.135	19.0333	3.80003		63.135	37.7114	24.7777
	63.204	59.8	71.9667		63.204	21.4892	3.78892		63.204	44.2003	28.6666
	63.273	53.6333	67.4333		63.273	23.9219	4.62219		63.273	53.0781	39.1444
	63.342	51.4	69.0667		63.342	25.4889	5.45559		63.342	64.7556	44.1889
	63.411	50.7333	67.7		63.411	34.7781	8.37781		63.411	69.0556	49.9556
	63.48	53.7	65.5		63.48	53.9003	10.0666		63.48	70.7663	52.8666
	63.549	51.3667	59.7333		63.549	70.8997	12.4334		63.549	72.6552	51.8889
	63.618	47.0333	57		63.618	92.4222	18.5222		63.618	74.3781	57.1778
	63.687	41	47.3		63.687	103.911	24.0444		63.687	78.0889	48.8556
	63.756	31.4667	36.2667		63.756	114.244	31.7111		63.756	71.5774	42.1444
	63.825	24.7	25		63.825	120.944	37.9111		63.825	71.7003	37.4
	63.894	18.9667	16.3		63.894	128.356	40.4889		63.894	69.3444	33.2444
	63.963	14.5	12.1333		63.963	136	43.6		63.963	58.4559	23.7556
	64.032	12.5333	11.0667		64.032	135.622	43.0889		64.032	49.1108	17.0111
	64.101	9.9333	9.2667		64.101	139.077	38.3111		64.101	38.9337	14.2667
	64.17	9	7.7		64.17	139.833	36.3667		64.17	30.9448	11.8445
	64.239	9.1667	8.3333		64.239	139.611	31.3111		64.239	28.1559	9.18889
	64.308	8.9333	8.5333		64.308	138.033	28.5333		64.308	28.7774	8.34444
	64.377	8.7	10.2333		64.377	133.056	27.6223		64.377	29.8886	6.78886
	64.446	11.5333	14		64.446	128.733	29.9		64.446	30.0003	5.70003
	64.515	13.4333	17.7667		64.515	125.578	30.0778		64.515	33.1889	6.65559
	64.584	16.6667	25.5		64.584	124.311	30.7778		64.584	37.0441	6.71111
	64.653	22.1333	33.0667		64.653	119.777	28.4444		64.653	34.733	5.6667
	64.722	29.5	41.2		64.722	118.077	27.4777		64.722	40.0667	6.89997
	64.791	32.7333	51		64.791	115.444	23.8778		64.791	40.5559	7.18889
	64.86	37.9	55.1667		64.86	109.578	19.6445		64.86	42.1552	5.02222
	64.929	40.4	55.5667		64.929	108.089	16.9222		64.929	46.7108	4.81108
	64.998	40.8333	50.9667		64.998	102.389	14.1556		64.998	59.0774	5.54444
	65.067	35.4	47.8333		65.067	91.7333	11.7333		65.067	74.3448	4.77778
	65.136	30.4667	42.8667		65.136	82.4667	9.66667		65.136	86.5222	5.62222
	65.205	26.7333	31.7333		65.205	68.3556	6.58886		65.205	98.3781	7.64441
	65.274	20.9667	25.4333		65.274	51.6111	4.57781		65.274	104.5	6.73333
	65.343	17.4333	20.5667		65.343	33.4556	3.95556		65.343	109.777	6.27774
	65.412	13.9667	15.3333		65.412	24.4333	2.76663		65.412	114.922	6.62219
	65.481	10.6667	11.1		65.481	18.8997	2.59997		65.481	119.022	8.15559
	65.55	8.9333	8.9333		65.55	15.7003	2.00003		65.55	120.111	9.57781
	65.619	6.8	6.7333		65.619	13.4337	1.76667		65.619	121.4	12.6667
	65.688	5.8667	5.7667		65.688	12.2781	1.21111		65.688	122.244	17.9111
	65.757	4.7	4.5667		65.757	11.2556	1.65556		65.757	120.722	25.2222
	65.826	4.7	4.4333		65.826	9.32222	1.38892		65.826	122.067	31.6334
	65.895	4.6333	4.1667		65.895	9.733	1.4		65.895	122.167	38.7667
	65.964	4.5333	3.7333		65.964	7.67778	1.14448		65.964	119.578	43.3778
	66.033	4.3333	3.7667		66.033	7.833	1.0667		66.033	122.433	49.0667
	66.102	4.4	4.5667		66.102	8.92222	1.05552		66.102	121.6	49.5333
	66.171	4.1333	4.6667		66.171	8.71111	1.27781		66.171	117.967	48.9
	66.24	5.2	5.5333		66.24	9.29967	1.33337		66.24	119.411	54.5111
	66.309	5.1	7.4667		66.309	8.76667	1.16667		66.309	123.811	55.4111
	66.378	5.7333	7.7667		66.378	10.5448	1.54448		66.378	124.678	62.2778
	66.447	5.3667	9.3333		66.447	12.267	1.3667		66.447	123.111	69.3111
	66.516	7.9	10.6667		66.516	13.9774	1.74444		66.516	118.056	70.9222
	66.585	9.9667	15.0333		66.585	19.0219	1.68889		66.585	109.989	77.2556
	66.654	11.2333	16.4		66.654	24.933	1.8		66.654	104.434	78.0667
	66.723	11.8667	16.0333		66.723	37.4114	2.04444		66.723	103.211	81.0777
	66.792	14.1333	14.6		66.792	47.533	2.8		66.792	102.9	81.0667
	66.861	12.2667	14.0333		66.861	56.6333	2.70003		66.861	97.9108	79.5778
	66.93	10.2667	12.9667		66.93	60.1667	3.96667		66.93	98.2441	84.0111
	66.999	9.0667	10.8333		66.999	59.9114	4.74444		66.999	93.2663	79.5666
	67.068	8.3333	9.4667		67.068	63.6781	6.44441		67.068	87.8667	78
	67.137	7.1667	7.9		67.137	66.433	8.1333		67.137	85.1778	76.1111
	67.206	6.0333	6.3667		67.206	67.0556	10.2889		67.206	79.2781	69.5111
	67.275	6.3667	6.0667		67.275	81.133	13.5		67.275	67.8559	56.2556
	67.344	6.4333	6.8333		67.344	93.2226	16.8223		67.344	53.9333	47.3333
	67.413	6.2667	7.2333		67.413	98.8003	21.6333		67.413	39.9774	37.5444
	67.482	7.1	7.8		67.482	102.634	25.3		67.482	32.2778	27.5111
	67.551	7.8333	9.2		67.551	107.145	25.7111		67.551	23.3448	24.0778
	67.62	8.5667	10.4333		67.62	109.678	27.0444		67.62	17.1889	17.9889
	67.689	10.4333	14.6		67.689	109.667	22.1		67.689	13.7781	13.1444
	67.758	13.2	19.3667		67.758	108.9	22.4666		67.758	11.8114	11.2444
	67.827	17.4333	29.5667		67.827	109.311	18.9778		67.827	9.48922	9.52222
	67.896	25.1333	39.1		67.896	101.589	15.2889		67.896	6.97778	8.44448
	67.965	32.7333	45.0667		67.965	96.6441	15.6444		67.965	7.60033	8.63333
	68.034	34.3333	53.2333		68.034	88.633	12.2333		68.034	4.91078	7.74448
	68.103	36.3667	53.9667		68.103	79.0003	10.6333		68.103	6.07811	6.27781
	68.172	35.5	55.8667		68.172	68.5997	7.53337		68.172	4.92222	5.98892
	68.241	36.9333	62.9333		68.241	58.8552	5.02222		68.241	5.79967	5.79997
	68.31	40.7333	67.4667		68.31	38.3889	4.05559		68.31	4.35589	5.55559
	68.379	47.8	75.6333		68.379	26.267	2.2667		68.379	5.35556	5.42226
	68.448	57.7	80.4		68.448	20.0333	2.60003		68.448	5.37811	5.64441
	68.517	63.9667	80.2333		68.517	15.567	2.0667		68.517	6.22189	4.18889
	68.586	65.9667	78.9333		68.586	13.3222	1.92222		68.586	5.68889	3.42219
	68.655	68.6	79.5333		68.655	11.9886	1.78886		68.655	3.94478	2.24448
	68.724	68.2	74.6333		68.724	12.2556	1.48886		68.724	4.47811	3.17781
	68.793	59.4667	68.3		68.793	10.3886	1.35556		68.793	3.82222	3.15552
	68.862	51.3667	57.9333		68.862	10.4	1.7333		68.862	3.91144	3.71114
	68.931	39.7667	40.7333		68.931	10.3003	1.90003		68.931	4.42256	3.78886
	69	26.5667	28.5333		69	11.0444	1.11114		69	4.56633	3.86663
	69.069	19.5	21.2667		69.069	12.367	1.4667		69.069	3.99967	2.49997
	69.138	16.3667	18		69.138	16.2003	1.53333		69.138	3.85556	2.78886
	69.207	14	15.2333		69.207	19.233	0.9333		69.207	3.94444	2.94444
	69.276	12.3667	13.8333		69.276	27.3114	0.844444		69.276	4.167	3.1
	69.345	12.1667	14		69.345	38.1886	1.12226		69.345	5.11144	2.67774
	69.414	13.5	17.6333		69.414	48.1003	0.933333		69.414	5.62256	1.72226
	69.483	18.5333	23.4667		69.483	56.8114	1.34444		69.483	11.3003	2.00003
	69.552	23.8	36.0333		69.552	62.1337	1.33337		69.552	18.9441	3.94441
	69.621	35	46.8		69.621	63.3226	1.05556		69.621	22.967	2.8667
	69.69	47.6333	62.3667		69.69	61.9222	1.42222		69.69	25.8663	3.13333
	69.759	53.9	67.5667		69.759	57.4889	2.42219		69.759	25.3003	2.16663
	69.828	53.9333	67.7667		69.828	52.3556	2.15556		69.828	24.5448	3.97778
	69.897	51.3333	62.1		69.897	42.2667	2.49997		69.897	18.1111	3.14441
	69.966	45.3667	60.2		69.966	33.267	2.8333		69.966	16.3219	3.28889
	70.035	41.8333	64.5667		70.035	27.4441	2.97781		70.035	13.0003	2.96663
	70.104	46.1667	71.8667		70.104	28.5337	4.23337		70.104	11.8448	4.41108
	70.173	54.0333	75.9		70.173	27.8778	5.24448		70.173	10.9552	3.55552
	70.242	56.6	74.8333		70.242	34.9226	5.48886		70.242	10.9222	2.48892
	70.311	57.6667	72.2667		70.311	48.6441	8.41111		70.311	12.667	3.1
	70.38	53.3333	69.5667		70.38	60.3226	10.5223		70.38	10.6108	2.64448
	70.449	50.5333	68		70.449	81.1781	14.1778		70.449	10.2219	3.08889
	70.518	46.8	58.5333		70.518	98.0219	22.6889		70.518	9.75556	3.72226
	70.587	40.7	51.2667		70.587	105.155	29.4889		70.587	10.2226	3.28886
	70.656	33.4333	40.2667		70.656	113.022	37.4889		70.656	8.41111	3.44441
	70.725	25.6	32.6333		70.725	111.622	37.9222		70.725	7.33333	4.30003
	70.794	21.4667	24.3		70.794	114.466	35.9666		70.794	7.81144	3.74444
	70.863	17.1	21.1		70.863	115.467	32.8667		70.863	8.88856	5.28886
	70.932	13.7333	16.5		70.932	113.144	25.8778		70.932	9.36633	6.10003
	71.001	13.4	14.8333		71.001	108.655	23.2222		71.001	9.21144	6.31114
	71.07	13.6333	15.2333		71.07	100.7	19.0667		71.07	14.1667	7.16667
	71.139	12.9667	15.5667		71.139	91.9111	20.5444		71.139	22.7552	7.15552
	71.208	14.0333	15.7333		71.208	87.033	17.2667		71.208	28.2333	5.93333
	71.277	15.3	17.4333		71.277	83.2559	17.3889		71.277	40.3781	6.97781
	71.346	15.3667	19.4		71.346	81.0003	13.9		71.346	49.4	7.4333
	71.415	16.8667	22.3667		71.415	75.4886	9.62226		71.415	52.1997	7.43337
	71.484	21.9	29.1333		71.484	63.7552	7.62222		71.484	52.4889	9.52219
	71.553	27.2333	35.8333		71.553	47.0003	5.90003		71.553	53.867	12.5
	71.622	35.1	46.3333		71.622	33.233	4.1		71.622	56.6114	12.8777
	71.691	42.4	52.2333		71.691	23.8889	3.32219		71.691	58.2111	17.0778
	71.76	51.3333	59.2667		71.76	20.3559	2.75559		71.76	59.4333	22.5
	71.829	52.4667	66.1333		71.829	15.5114	2.24444		71.829	67.8114	31.9777
	71.898	58.8333	73.3333		71.898	13.0774	1.84444		71.898	73.6108	35.7445
	71.967	65.5667	74.6667		71.967	11.4559	1.78889		71.967	77.4997	42.4
	72.036	70.9333	76.9667		72.036	10.4552	1.52222		72.036	81.3337	50.9334
	72.105	70.0333	77.6333		72.105	9.55522	1.52222		72.105	83.567	57.6333
	72.174	67.8333	72.7		72.174	9.33367	1.63337		72.174	86.1781	61.7778
	72.243	57.3333	66		72.243	9.84411	1.61111		72.243	87.6778	69.3778
	72.312	50.1	64.5333		72.312	9.23333	1.13333		72.312	90.8778	73.5778
	72.381	51.5333	62.1		72.381	8.35556	1.15556		72.381	88.1108	78.7445
	72.45	52.3	58.4		72.45	8.74411	1.37781		72.45	88.5226	80.7223
	72.519	51.3667	54.5		72.519	9.32222	2.08892		72.519	90.8778	78.9778
	72.588	45	49.3667		72.588	11.0444	2.07774		72.588	88.0781	77.1111
	72.657	42.4	48.8667		72.657	11.0441	2.31111		72.657	86.2003	74.7333
	72.726	46.2333	55.1		72.726	13.5	2.8		72.726	88.5337	76.2667
	72.795	50.9667	61.2		72.795	16.6552	2.82222		72.795	84.5781	70.0444
	72.864	52.9	64.3		72.864	22.033	4.4333		72.864	80.0222	73.5555
	72.933	50.1	60.4333		72.933	33.2111	5.81111		72.933	76.8226	72.0889
	73.002	45.8667	51.6333		73.002	47.3108	7.57778		73.002	72.0556	68.6556
	73.071	40.1333	38.8		73.071	60.5333	9.26663		73.071	63.1444	60.7777
	73.14	29.1333	29		73.14	66.4448	10.8778		73.14	56.2889	52.4222
	73.209	21.7	21.4333		73.209	70.3774	10.6444		73.209	49.6559	42.3889
	73.278	15.9333	13.4		73.278	72.7781	11.3778		73.278	36.4556	35.8556
	73.347	11.8667	10.2333		73.347	73.0108	13.2111		73.347	25.9892	27.9222
	73.416	10.6	9.1333		73.416	79.5114	16.9111		73.416	19.4997	22.9334
	73.485	10.0667	8.8		73.485	86.1889	20.8556		73.485	15.0889	16.3556
	73.554	9.2667	8.5333		73.554	90.9892	22.8889		73.554	12.2114	13.1111
	73.623	8	7.2333		73.623	92.5663	24.2666		73.623	10.2892	12.4555
	73.692	7.5333	6.7		73.692	94.3778	24.5778		73.692	8.32256	10.0556
	73.761	6.6	5.6667		73.761	95.3441	23.2111		73.761	6.97811	8.81111
	73.83	6.8	5.3		73.83	94.5219	20.9889		73.83	5.75522	6.82222
	73.899	7.4	5.2333		73.899	90.0663	17.1333		73.899	5.35589	6.25559
	73.968	7.2667	5.8		73.968	87.0559	15.6222		73.968	5.61078	6.97778
	74.037	8.6667	6.7		74.037	81.2892	12.8889		74.037	5.57811	5.94441
	74.106	9.2333	7.7667		74.106	76.433	14.1333		74.106	4.15556	5.82226
	74.175	9.6333	9.3333		74.175	76.1448	16.3445		74.175	3.10033	4.63333
	74.244	10.5667	9.7333		74.244	75.0448	17.7778		74.244	4.91144	6.04444
	74.313	11.6667	8.8333		74.313	81.1774	20.3444		74.313	4.55589	5.58889
	74.382	10.7333	8.8333		74.382	81.767	18.8333		74.382	4.92256	4.92226
	74.451	10.1	9.1667		74.451	85.5997	17.7334		74.451	5.54411	5.24441
	74.52	10.5333	11.2333		74.52	83.3559	17.8556		74.52	4.86667	5.76667
	74.589	9.9667	10.8		74.589	81.3219	15.5222		74.589	7.35589	7.95559
	74.658	9.4	10.0333		74.658	75.8	13.6		74.658	6.63367	6.69997
	74.727	9.1	8.6333		74.727	73.0552	10.1222		74.727	6.65589	7.95559
	74.796	8.4667	7.7		74.796	57.8781	8.57781		74.796	6.967	8.7667
	74.865	7.0667	7.6333		74.865	43.8886	7.88886		74.865	9.12189	9.22219
	74.934	7.6667	7.0667		74.934	41.4892	8.58892		74.934	11.3663	11.0333
	75.003	8.6	7.6333		75.003	45.5337	11.2334		75.003	16.6441	13.1778
	75.072	8.0333	9.2333		75.072	54.8889	12.5556		75.072	29.0886	18.6556
	75.141	8.7667	9.1667		75.141	69.067	13.4		75.141	48.3108	22.7111
	75.21	9.5	10.6		75.21	79.4219	17.3556		75.21	60.5781	30.1111
	75.279	10.6333	13.6667		75.279	85.6892	19.3555		75.279	68.6889	42.5222
	75.348	13.4667	16.9667		75.348	88.4333	22.4666		75.348	72.4889	48.7889
	75.417	16.8	21.1333		75.417	91.1219	25.2889		75.417	72.6886	52.9223
	75.486	20.6	28.7		75.486	89.3886	20.4889		75.486	74.4778	53.4778
	75.555	25.0667	40.8		75.555	90.5778	19.4445		75.555	74.033	58.0333
	75.624	31.6667	51.6667		75.624	87.2448	18.8111		75.624	71.4552	55.1555
	75.693	40.0667	57.6333		75.693	82.3892	16.5222		75.693	67.1886	52.2556
	75.762	51.0333	65.5667		75.762	79.8219	12.8222		75.762	64.8222	48.5222
	75.831	54.9667	67.9333		75.831	74.2556	11.0889		75.831	62.6448	45.3445
	75.9	58.7333	68.9333		75.9	65.6333	9.63333		75.9	58.7219	43.9222
	75.969	56.5333	62.2667		75.969	54.4	7.2667		75.969	54.2108	41.0111
	76.038	50.5	53.5333		76.038	48.833	7.6333		76.038	49.3333	38.2666
	76.107	43.3333	50.1667		76.107	46.3108	8.21108		76.107	38.0559	30.8889
	76.176	40.5333	49.9		76.176	51.5774	10.1777		76.176	29.0111	24.8111
	76.245	40.2333	52.7667		76.245	57.7774	10.1777		76.245	18.8444	23.8111
	76.314	44.8667	58.9333		76.314	60.1114	11.4111		76.314	13.533	15.9
	76.383	52.5	65.9		76.383	62.1559	10.6889		76.383	9.27778	10.9445
	76.452	54.9	65.5		76.452	61.2448	9.04448		76.452	6.46633	8.80003
	76.521	61.2667	70.6667		76.521	61.1667	7.99997		76.521	6.08889	8.15559
	76.59	63.4	70.3333		76.59	56.1444	6.01114		76.59	5.21144	6.11114
	76.659	65.2	71.5667		76.659	49.0222	4.38892		76.659	3.79967	5.99997
	76.728	65.0333	73.2		76.728	40.4886	3.48886		76.728	5.27811	5.37781
	76.797	63.7667	70.1		76.797	27.8889	2.72219		76.797	4.68922	5.02222
	76.866	60.1	67.6667		76.866	21.4219	2.18889		76.866	4.53367	4.69997
	76.935	57.2667	61.2		76.935	16.1108	2.41108		76.935	3.72256	4.95556
	77.004	48.3333	54		77.004	12.5774	1.81114		77.004	4.24444	4.11114
	77.073	41.4333	51.6333		77.073	12.2441	1.54441		77.073	4.367	3.3
	77.142	36.6	46.5		77.142	10.133	1.5333		77.142	3.22222	2.95552
	77.211	35.7667	47.7333		77.211	10.4003	2.00003		77.211	3.70033	4.30003
	77.28	35.2667	52.1		77.28	9.83367	1.53337		77.28	4.67744	6.91114
	77.349	40	56.0333		77.349	8.63367	1.56667		77.349	5.47811	4.91111
	77.418	47.6333	61.5		77.418	9.78856	1.95556		77.418	9.32222	8.22222
	77.487	50.9333	67.8667		77.487	9.73333	1.73333		77.487	11.2226	7.78886
	77.556	53.2333	72.0333		77.556	9.88922	1.45552		77.556	11.5892	9.02222
	77.625	53.1333	70.9		77.625	9.85556	1.38886		77.625	12.5441	11.2111
	77.694	54.8	65.7333		77.694	10.4892	1.62222		77.694	11.9781	10.6111
	77.763	47.7333	51.7		77.763	9.55589	1.95559		77.763	9.33367	11.1
	77.832	37.0333	38.8333		77.832	11.6	2.1		77.832	7.29967	8.09997
	77.901	25.9333	26.3		77.901	12.3	1.9333		77.901	6.24411	8.21111
	77.97	18.4	17.5333		77.97	12.6997	2.73337		77.97	5.39967	5.99997
	78.039	13.9667	13.1333		78.039	14.5444	2.11114		78.039	4.21078	4.71108
	78.108	10.4333	11		78.108	16.9222	3.12222		78.108	3.72222	4.65552
	78.177	9.8667	9.3		78.177	19.467	3.7		78.177	3.967	6.1333
	78.246	8.9667	8.5333		78.246	25.5889	5.15559		78.246	4.65522	5.55552
	78.315	9.4667	8.5667		78.315	33.6337	5.96667		78.315	4.47811	3.67781
	78.384	8.5	9.7667		78.384	42.7559	8.98889		78.384	5.36667	3.63337
	78.453	9.8333	10.5		78.453	61.3889	12.7556		78.453	4.82222	4.65552
	78.522	10.3	10.6667		78.522	76.6997	17.9334		78.522	4.25556	4.12226
	78.591	9.8	11.4333		78.591	87.0111	21.6778		78.591	6.66633	4.93333
	78.66	10.0667	11.9333		78.66	92.4	26.5333		78.66	6.16667	4.86667
	78.729	9	11.5333		78.729	97.2333	28.6		78.729	4.55556	5.35556
	78.798	7.9	10.0667		78.798	101.144	27.3777		78.798	5.84444	5.31114
	78.867	7.2	9.8		78.867	98.3559	23.5889		78.867	6.71144	5.87774
	78.936	7.4	10		78.936	96.9552	20.9222		78.936	6.62222	4.42222
	79.005	7.3333	9.4333		79.005	94.1667	17.5667		79.005	6.48856	4.78886
	79.074	7.9	10.1667		79.074	89.733	15.6		79.074	7.42256	4.78886
	79.143	8.8333	10.3667		79.143	78.0226	13.1223		79.143	8.467	7.5
	79.212	9.0333	12.0667		79.212	71.5003	12		79.212	9.77778	7.24448
	79.281	9.7	11.9		79.281	65.5774	9.81114		79.281	11.5333	8.10003
	79.35	9.7	13.0333		79.35	60.9559	8.28889		79.35	15.7108	10.7111
	79.419	11.7	13.9333		79.419	57.6114	6.91114		79.419	23.4	14.6333
	79.488	13.7	16.6		79.488	51.4222	6.62222		79.488	31.3886	17.2556
	79.557	16.2667	21.2333		79.557	47.6774	5.51114		79.557	41.7889	22.8222
	79.626	18.9333	25.7		79.626	39.1337	4.76667		79.626	54.2337	27.3334
	79.695	21.6667	31.8		79.695	31.7663	5.06663		79.695	64.4114	36.6444
	79.764	28.4667	38.8333		79.764	26.8892	4.72222		79.764	68.5778	41.4445
	79.833	34.3667	49.2333		79.833	28.8003	4.86663		79.833	71.9337	45.3667
	79.902	40.9667	57.6		79.902	32.6559	4.98889		79.902	76.4222	45.1222
	79.971	51.1667	68.3667		79.971	30.8003	4.30003		79.971	81.2111	52.8111
	80.04	60.6667	79.3333		80.04	29.733	4.1333		80.04	86.4667	59.9667
	80.109	68.7667	86.3333		80.109	25.4778	4.14448		80.109	89.5774	67.4111
	80.178	77	91.5667		80.178	20.9337	3.59997		80.178	90.7333	68.6
	80.247	76.6333	89.6		80.247	18.7997	3.09997		80.247	90.3337	68
	80.316	70.1667	86.6333		80.316	16.0559	2.38889		80.316	91.7111	67.8444
	80.385	66	83.8667		80.385	15.567	2.4		80.385	90.133	68.3333
	80.454	60.4667	80.8333		80.454	15.3448	2.54448		80.454	95.6333	68
	80.523	61.6667	81.2		80.523	15.3337	3.16667		80.523	97.0997	71.3334
	80.592	63.0667	80.8		80.592	15.5781	3.04441		80.592	95.0108	75.8778
	80.661	66.7333	78.8667		80.661	16.8552	3.88892		80.661	95.3	73.3667
	80.73	67.0333	77.6667		80.73	18.7663	4.00003		80.73	101.545	73.4111
	80.799	64.6333	72.2333		80.799	22.6108	4.41108		80.799	102.366	79.9
	80.868	69.4	74.2333		80.868	27.167	5.4333		80.868	101.467	78.2667
	80.937	72.4333	80.2333		80.937	33.3889	5.52219		80.937	100.967	76.4333
	81.006	77.0667	83.0333		81.006	40.9663	6.76663		81.006	98.5774	79.8444
	81.075	77.8	82.2333		81.075	51.6778	7.97778		81.075	96.9	74.7333
	81.144	74.6333	82.0333		81.144	58.1663	9.20003		81.144	92.6333	69.0333
	81.213	69.8667	79.4333		81.213	65.8667	11.9667		81.213	88.833	68.3667
	81.282	68.0667	79.2667		81.282	75.9448	14.1778		81.282	81.1774	63.9444
	81.351	64.4667	75.3		81.351	85.5886	18.6889		81.351	63.4441	54.7444
	81.42	66.9	73.2667		81.42	90.2556	20.0223		81.42	46.4337	43.6334
	81.489	62.6667	66.9667		81.489	97.2222	24.1889		81.489	30.033	31.8333
	81.558	59.3333	61.0667		81.558	99.8886	26.6223		81.558	20.5333	22.1333
	81.627	50.4	53.3333		81.627	103.189	28.0556		81.627	14.7774	18.1111
	81.696	38.4333	41.2333		81.696	105.4	25.6333		81.696	15.5892	12.7222
	81.765	24.4667	33.8		81.765	105.344	28.3111		81.765	21.0108	13.1778
	81.834	17.3667	21		81.834	107.411	24.1444		81.834	24.2892	13.5555
	81.903	14.6	18.9667		81.903	103.377	24.4111		81.903	24.033	15.6
	81.972	11.5667	14.9333		81.972	100.989	22.0889		81.972	22.2108	16.8778
	82.041	11.3333	11.6333		82.041	93.8889	17.2889		82.041	23.3333	20.5666
	82.11	10.2	10.3667		82.11	87.5781	12.7111		82.11	17.3337	15
	82.179	9.3	9		82.179	77.1448	8.61108		82.179	14.1448	13.6778
	82.248	8.1	8.4667		82.248	59.3114	6.41114		82.248	12.0559	13.9889
	82.317	7.1667	8.4333		82.317	35.8108	4.54448		82.317	9.67744	8.27774
	82.386	6.9667	7.7		82.386	27.0333	3.46663		82.386	7.35589	6.62219
	82.455	5.9667	8		82.455	22.1219	2.95559		82.455	7.05589	6.68889
	82.524	5.7667	7.5		82.524	17.1778	2.97778		82.524	4.09967	4.76667
	82.593	5.4	8.1667		82.593	15.0444	2.37774		82.593	5.24444	6.44444
	82.662	5.8667	8.2		82.662	14.1	2.3667		82.662	5.52189	5.58889
	82.731	6.3333	9.4		82.731	13.533	2.3333		82.731	5.18856	4.48886
	82.8	6.3333	8.9333		82.8	14.1667	3.16667		82.8	4.65522	4.65552
	82.869	6.3	8.0667		82.869	14.6226	2.58886		82.869	4.34411	3.84441
	82.938	6.1	7.9667		82.938	14.8778	2.77778		82.938	4.71078	3.67778
	83.007	7.7	8.4333		83.007	13.6226	2.45556		83.007	5.14444	4.17774
	83.076	6.9	9.4		83.076	14.5114	3.11114		83.076	4.37811	4.34441
	83.145	6.6667	8.9		83.145	15.867	2.5667		83.145	3.867	2.4
	83.214	6.7333	7.8667		83.214	16.7219	2.65559		83.214	5.25556	3.18886
	83.283	6.8	8.4		83.283	17.3997	2.93337		83.283	5.22256	3.55556
	83.352	6.1667	8.6		83.352	17.1441	3.41111		83.352	3.64411	1.87781
	83.421	7.2	8.0333		83.421	17.033	3.1667		83.421	4.42189	3.35559
	83.49	6.5	9.0333		83.49	19.0552	3.85552		83.49	4.38889	2.95559
	83.559	6.2667	9.9333		83.559	19.8444	4.01114		83.559	4.26667	3.89997
	83.628	6.3667	9.4667		83.628	23.6667	4.23337		83.628	4.67744	2.37774
	83.697	7	12.8333		83.697	26.9552	5.48892		83.697	5.07811	3.77781
	83.766	6.9333	14.2333		83.766	36.2778	6.81108		83.766	3.78856	3.82226
	83.835	8.3667	15.7667		83.835	50.1552	8.62222		83.835	4.83367	3.99997
	83.904	10.5667	17.3667		83.904	69.8	11.3333		83.904	4.95556	4.08886
	83.973	12.1333	17.4667		83.973	82.9556	14.3889		83.973	5.72222	3.52222
	84.042	11.1	18.8		84.042	91.8448	17.6778		84.042	5.78856	3.25556
	84.111	11	16.2667		84.111	107.377	21.5444		84.111	5.08856	3.18886
	84.18	8.8333	15.7667		84.18	117.4	28.7667		84.18	6.18922	3.52222
	84.249	7.8	14.4333		84.249	126.5	34.7		84.249	7.967	1.3
	84.318	7.5	12.7667		84.318	133.422	39.8889		84.318	6.85556	3.55556
	84.387	7.2333	12.9		84.387	138.122	43.2222		84.387	5.48889	3.48889
	84.456	9	11.9667		84.456	141.978	47.4444		84.456	5.14444	3.41114
	84.525	7.9333	11.9		84.525	143.878	51.1444		84.525	5.75522	5.28892
	84.594	8.5	13.9		84.594	146.855	52.8555		84.594	5.53333	4.30003
	84.663	10.5667	13.7667		84.663	150.366	54.4		84.663	4.61078	2.61108
	84.732	10.2333	16.2667		84.732	153.867	51.1		84.732	5.42256	4.52226
	84.801	12.9	17.1667		84.801	156.055	51.3222		84.801	5.07811	5.97781
	84.87	16.7333	19.5		84.87	158.889	56.0889		84.87	5.31144	3.94444
	84.939	18.6333	26.1333		84.939	160.756	58.5556		84.939	6.467	4.9333
	85.008	24.3333	32.0333		85.008	164.844	63.2111		85.008	7.35556	4.35556
	85.077	27.7	37.2667		85.077	164.833	67.4		85.077	8.97778	5.37778
	85.146	33.8	39.7		85.146	165.366	73.5333		85.146	11.2559	6.88889
	85.215	38.1	43.9667		85.215	171.178	74.7445		85.215	17.5892	9.45552
	85.284	44.5333	50.5667		85.284	171.756	78.1889		85.284	25.867	12.2667
	85.353	49	56.3333		85.353	174.889	78.7555		85.353	31.5333	17.1
	85.422	54.0667	62.9667		85.422	175.6	79.9666		85.422	39.9552	18.3222
	85.491	56.6333	61.7667		85.491	174.089	78.1223		85.491	47.5226	21.3223
	85.56	55	63.4		85.56	174.311	77.4444		85.56	53.0219	25.5556
	85.629	49.5667	56.9		85.629	172.156	75.6222		85.629	52.6559	25.9222
	85.698	41.0667	49.3333		85.698	171.023	72.4223		85.698	48.4	28.0667
	85.767	35.2333	39.4667		85.767	168.823	70.6556		85.767	43.867	27.3333
	85.836	31.8667	37.3667		85.836	164.067	64.6		85.836	42.2333	26.7666
	85.905	27.6667	31.9667		85.905	158.856	57.3223		85.905	37.1219	25.0556
	85.974	22.8333	30.7		85.974	153.877	45.8444		85.974	31.3	20.5333
	86.043	19.5333	26.7333		86.043	146.067	35.7334		86.043	25.9774	22.8444
	86.112	16.5	22.6		86.112	136.267	22.5		86.112	21.4	16.9333
	86.181	15	20.2333		86.181	121.344	15.2111		86.181	18.8559	13.8889
	86.25	14.2	17.6333		86.25	104.878	12.6111		86.25	12.3448	12.7111
	86.319	12.1333	14.7333		86.319	91.0892	9.02222		86.319	10.1667	9.83337
	86.388	14.4667	15.8667		86.388	78.8556	6.95556		86.388	6.84478	7.24448
	86.457	14.5667	15.7333		86.457	62.3444	6.37774		86.457	7.67778	5.87778
	86.526	12.8	16.6333		86.526	51.1781	5.71111		86.526	7.75522	7.18892
	86.595	12.8333	15.0333		86.595	38.3448	4.44448		86.595	7.53333	7.90003
	86.664	11.4	13.1333		86.664	32.2441	3.84441		86.664	7.033	8
	86.733	13.0333	12.1667		86.733	32.3781	3.74441		86.733	8.47778	5.61108
	86.802	11.7667	13.1		86.802	28.833	4.0667		86.802	11.3	7.7333
	86.871	10.7333	11.4333		86.871	25.4226	3.52226		86.871	12.4778	8.47778
	86.94	10.7	11.8		86.94	22.7448	3.91108		86.94	19.033	9.4
	87.009	10.8	11.5		87.009	22.833	4.2		87.009	27.6663	10.2666
	87.078	11.9	12.1		87.078	22.2556	3.78886		87.078	48.9778	17.1445
	87.147	11.5	10.3667		87.147	24.2552	4.72222		87.147	62.7778	21.4778
	87.216	10.2	11.1		87.216	27.8	5.4667		87.216	71.4892	23.7555
	87.285	10.7333	10.8667		87.285	32.1222	7.22222		87.285	77.8997	32.4
	87.354	11.4	11.4		87.354	42.3219	8.35559		87.354	80.467	39.3667
	87.423	12.7667	13		87.423	55.6781	10.5444		87.423	86.6337	43.8667
	87.492	13.3667	13.9		87.492	81.3448	15.4445		87.492	87.667	51.3333
	87.561	14.3	14.8333		87.561	100.334	21.6		87.561	88.2219	53.2889
	87.63	14	15.4333		87.63	109.6	30.9667		87.63	89.9108	56.2778
	87.699	15.9667	17.3333		87.699	116.955	40.2222		87.699	93.1337	64.6334
	87.768	16.4667	18.6333		87.768	123.444	45.9777		87.768	90.7441	62.1111
	87.837	17.5667	20.2667		87.837	123.523	50.8556		87.837	91.8111	66.7778
	87.906	19.0333	23		87.906	127.233	47.5333		87.906	90.5886	65.8889
	87.975	19.7667	26.9667		87.975	125.333	37.7333		87.975	89.9003	67.6
	88.044	22.7667	30.9333		88.044	120.389	31.1889		88.044	87.9337	68.3
	88.113	25.9333	35.2667		88.113	117.722	23.2889		88.113	82.3337	62.1667
	88.182	27.7	38.9333		88.182	109.122	17.2889		88.182	81.567	60.6333
	88.251	28.6667	41.9667		88.251	94.3441	12.0111		88.251	75.2556	56.2223
	88.32	32.9	41.8667		88.32	71.3219	9.25559		88.32	70.667	46.6667
	88.389	32.1333	40.3667		88.389	48.167	7.6333		88.389	64.5333	43.8666
	88.458	30.9	38.9		88.458	36.9114	5.97774		88.458	56.833	36.6667
	88.527	27.0667	34.3		88.527	35.1	6.0667		88.527	47.6108	29.8111
	88.596	24.1667	25.9333		88.596	33.6111	4.84441		88.596	34.5222	28.1222
	88.665	18.1667	20.1667		88.665	30.4997	4.63337		88.665	21.3226	18.9556
	88.734	13.9333	17.4		88.734	26.8114	3.81114		88.734	15.0781	14.9778
	88.803	11.9333	15.5333		88.803	19.733	3.1		88.803	12.9337	12.5334
	88.872	11.6667	13.3333		88.872	14.8559	2.68889		88.872	10.2552	10.5889
	88.941	12.0333	12.1667		88.941	12.3667	2.06667		88.941	7.77744	7.37774
					89.01	11.4444	1.54444
					89.079	11.1226	1.72226
					89.148	10.6997	2.19997
