# Supplementary material for: Sustained expression of unc-4 homeobox gene and unc-37/Groucho in postmitotic neurons specifies the spatial organization of the cholinergic synapses in C. elegans
Source: eLife. 2021 Aug 13;10:e66011. doi: 10.7554/eLife.66011 (PMC8363302; doi:10.7554/eLife.66011)
Supplement: Figure 1—figure supplement 3—source data 1. [file elife-66011-fig1-figsupp3-data1.xlsx]

## Sheet: Sheet1
Figure 1-figure supplement 3D			Quantification of overlap between DA8 and DA9 synaptic domains in plx-1 mutant animals.
	DA8/DA9 overlap (um)
genotype	wildtype	plx-1(nc36)	unc-4(e120)	unc-4(e120);plx-1(nc36)	unc-37(e262)	unc-37(e262);plx-1(nc36)
	11.762	31.04	50.151	61.59	91.946	53.02
	5.589	59.301	50.748	46.495	45.566	47.952
	14.77	37.811	60.524	58.391	48.232	45.319
	13.463	36.193	37.239	56.953	39.704	56.525
	15.233	24.703	42.562	89.802	64.941	54.931
	23.44	49.97	57.752	39.609	68.715	94.641
	4.772	34.885	33.672	45.069	41.804	64.733
	9.41	48.837	33.803	69.888	56.706	67.945
	7.992	61.86	56.622	37.033	74.525	93.312
	3.616	24.688	42.789	56.597	87.606	58.708
	8.781	57.524	19.43	32.282	28.509	52.084
	8.891	46.313	67.294	45.843	52.272	61.229
	5.224	49.384	46.464	63.458	51.366	39.307
	11.795	61.056	34.578	51.856	38.909	50.346
	20.887	38.359	54.333	57.509	58.012	45.498
	1.292	50.181	40.624	49.2	79.74	37.64
	11.537	46.758	50.61	49.793	35.729	42.769
	2.486	34.135	37.197	49.646	62.639	41.736
	0	67.409	56.49	54.534	81.318	47.19
		50.701	32.466	44.885	65.312	45.694
		47.392	61.668	40.749	72.157	32.649
		47.875	55.418	60.079	47.117	38.984
		40.6	74.818	43.522	54.663	47.244
		49.942	62.351	61.885	40.737	52.906
		34.486	44.353	51.841	37.1	47.633
		23.879	53.348	49.977	55.233	36.225
		43.056	48.265	53.539	41.175	41.557
		44.003	37.348	52.113	35.894	49.737
		36.078	49.718	78.216	46.932	48.493
		53.05	55.041	43.968	58.538	35.697
		53.441	48.031	50.526	82.984	71.966
		33.218	61.944	39.541	63.447	51.774
		36.103	31.348	67.559	37.878	51.584
		44.827	38.822	50.243	49.359	49.18
		30.473	59.01	63.035	67.016	68.92
		47.958	40.79	48.118	54.715	40.258
		33.534	58.917	59.818	60.365	43.596
		47.383	56.747		40.568	63.138
		39.87	33.288			51.814
			43.971			64.87
