# Supplementary material for: Sustained expression of unc-4 homeobox gene and unc-37/Groucho in postmitotic neurons specifies the spatial organization of the cholinergic synapses in C. elegans
Source: eLife. 2021 Aug 13;10:e66011. doi: 10.7554/eLife.66011 (PMC8363302; doi:10.7554/eLife.66011)
Supplement: Figure 1—figure supplement 4—source data 1. [file elife-66011-fig1-figsupp4-data1.xlsx]

## Sheet: Sheet1
Figure 1-figure supplement 4D			Quantification of animals (n=100) that expressed Pplx-1::GFP in the anterior and posterior DA8/DA9 of wildtype, unc-4(e120), and unc-37(e262) animals.
	# of animals expressing GFP
	Anterior DA8/9		Posterior DA8/9
	Present	Absent	Present	Absent
wildtype	95	5	93	7
unc-4(e120)	87	13	90	10
unc-37(e262)	82	18	87	13
