# Supplementary material for: Sustained expression of unc-4 homeobox gene and unc-37/Groucho in postmitotic neurons specifies the spatial organization of the cholinergic synapses in C. elegans
Source: eLife. 2021 Aug 13;10:e66011. doi: 10.7554/eLife.66011 (PMC8363302; doi:10.7554/eLife.66011)
Supplement: Figure 1—figure supplement 4—source data 2. [file elife-66011-fig1-figsupp4-data2.xlsx]

## Sheet: Sheet1
Figure 1-figure supplement 4H			Quantification of animals (n=100) that expressed Prap-2::GFP in the anterior and posterior DA8/9 of wildtype, unc-4, and unc-37 animals.
	# of animals expressing GFP
	Anterior DA8/9		Posterior DA8/9
	Present	Absent	Present	Absent
wildtype	100	0	100	0
unc-4(e120)	99	1	99	1
unc-37(e262)	100	0	100	0
