# Supplementary material for: Sustained expression of unc-4 homeobox gene and unc-37/Groucho in postmitotic neurons specifies the spatial organization of the cholinergic synapses in C. elegans
Source: eLife. 2021 Aug 13;10:e66011. doi: 10.7554/eLife.66011 (PMC8363302; doi:10.7554/eLife.66011)
Supplement: Figure 1—source data 1. [file elife-66011-fig1-data1.xlsx]

## Sheet: Sheet1
Figure 1E	Quantification of overlap between DA8 and DA9 synaptic domains
	DA8/DA9 overlap (um)
genotype	wildtype	unc-4(e120)	unc-37(e262)	unc-37(e262); unc-4(e120)	unc-4(e26)
	11.762	50.151	91.946	73.451	53.212
	5.589	50.748	45.566	65.36	51.58
	14.77	60.524	48.232	78.937	48.145
	13.463	37.239	39.704	53.646	48.766
	15.233	42.562	64.941	49.999	48.538
	23.44	57.752	68.715	69.698	37.078
	4.772	33.672	41.804	64.62	20.355
	9.41	33.803	56.706	44.402	73.3
	7.992	56.622	74.525	67.682	49.627
	3.616	42.789	87.606	38.664	33.664
	8.781	19.43	28.509	37.849	67.903
	8.891	67.294	52.272	65.675	51.466
	5.224	46.464	51.366	54.098	65.239
	11.795	34.578	38.909	81.101	78.845
	20.887	54.333	58.012	65.828	31.568
	1.292	40.624	79.74	39.773	40.395
	11.537	50.61	35.729	55.426	57.297
	2.486	37.197	62.639	52.043	53.307
	0	56.49	81.318	38.601	59.013
		32.466	65.312	79.182	86.781
		61.668	72.157	43.775	38.407
		55.418	47.117	55.569
		74.818	54.663	74.397
		62.351	40.737	72.881
		44.353	37.1	38.141
		53.348	55.233	39.746
		48.265	41.175	43.12
		37.348	35.894	51.403
		49.718	46.932	58.033
		55.041	58.538	55.289
		48.031	82.984	57.524
		61.944	63.447	48.656
		31.348	37.878	83.223
		38.822	49.359
		59.01	67.016
		40.79	54.715
		58.917	60.365
		56.747	40.568
		33.288
		43.971
