# Supplementary material for: Sustained expression of unc-4 homeobox gene and unc-37/Groucho in postmitotic neurons specifies the spatial organization of the cholinergic synapses in C. elegans
Source: eLife. 2021 Aug 13;10:e66011. doi: 10.7554/eLife.66011 (PMC8363302; doi:10.7554/eLife.66011)
Supplement: Figure 2—source data 1. [file elife-66011-fig2-data1.xlsx]

## Sheet: Sheet1
Figure 2E	Quantification of overlap of DA8 and DA9 synaptic domains of unc-4(miz40); mizSi3 and unc-37(miz36); mizSi3 animals treated with (+) and without (-) auxin.
	DA8/DA9 overlap (um)
genotype	wildtype	unc-4(miz40)		unc-37(miz36)
experimental condition	+ auxin	- auxin	+ auxin	- auxin	+ auxin
	7.326	13.457	22.848	8.63	42.9
	11.495	1.711	34.618	12.237	55.357
	9.54	2.809	49.639	5.313	36.611
	11.363	0	43.608	13.283	72.483
	2.931	14.734	31.01	18.2	42.451
	3.051	11.153	35.837	15.85	52.527
	6.552	0	19.795	14.343	35.787
	6.343	1.633	43.514	14.333	45.708
	2.373	5.999	44.11	9.117	44.21
	6.448	10.6	46.236	15.328	46.644
	15.312	1.712	28.971	28.062	67.115
	14.089	1.706	29.009	7.794	62.691
	6.471	0	38.351	31.987	67.901
	10.759	2.97	25.834	2.729	46.063
	0	0	42.671	7.179	49.695
	5.611	8.552	28.524	10.2	13.357
	0	7.504	26.782	13.43	77.13
	7.251	0	32.336	20.437	33.309
	4.975	20.409	34.203	14.52	44.642
	13.113	0		19.798	34.159
	5.779	10.784		11.314	51.297
				16.624	39.991
				24.112	65.097
				20.956
				16.298
