# Supplementary material for: Sustained expression of unc-4 homeobox gene and unc-37/Groucho in postmitotic neurons specifies the spatial organization of the cholinergic synapses in C. elegans
Source: eLife. 2021 Aug 13;10:e66011. doi: 10.7554/eLife.66011 (PMC8363302; doi:10.7554/eLife.66011)
Supplement: Figure 2—source data 2. [file elife-66011-fig2-data2.xlsx]

## Sheet: Sheet1
Figure 2F	Cell specific rescue of unc-4(e120) mutants with unc-4 cDNA using DA-specific promoter (Punc-4c)
	DA8/DA9 overlap (um)
genotype	wildtype	unc-4(e120)
transgene	No transgene	No transgene	Ex[Punc-4c::unc-4] #1	Ex[Punc-4c::unc-4] #2	Ex[Punc-4c::unc-4] #1	Ex[Punc-4c::unc-4] #2
			DA8+DA9	DA8+DA9	DA9	DA9
	11.762	50.151	15.254	14.492	48.721	37.471
	5.589	50.748	23.052	30.987	50.188	45.46
	14.77	60.524	17.931	26.096	38.999	55.222
	13.463	37.239	0	7.671	49.261	51.177
	15.233	42.562	16.152	19.267	47.884	41.134
	23.44	57.752	10.378	16.102	46.575	30.728
	4.772	33.672	37.024	16.854	47.132	36.912
	9.41	33.803	36.737	18.827	45.961	21.419
	7.992	56.622	19.759	27.092	36.336	31.609
	3.616	42.789	23.404	27.552	29.193
	8.781	19.43	23.277	25.412	47.686
	8.891	67.294	21.691	14.872	39.622
	5.224	46.464	3.8	54.048	32.111
	11.795	34.578	19.49	27.633	65.205
	20.887	54.333	16.207	25.224	54.018
	1.292	40.624	17.331	25.978
	11.537	50.61	44.69	6.223
	2.486	37.197	24.135	18.64
	0	56.49	26.64
		32.466	30.962
		61.668	17.969
		55.418	42.933
		74.818	20.332
		62.351	17.555
		44.353
		53.348
		48.265
		37.348
		49.718
		55.041
		48.031
