# Supplementary material for: Sustained expression of unc-4 homeobox gene and unc-37/Groucho in postmitotic neurons specifies the spatial organization of the cholinergic synapses in C. elegans
Source: eLife. 2021 Aug 13;10:e66011. doi: 10.7554/eLife.66011 (PMC8363302; doi:10.7554/eLife.66011)
Supplement: Figure 2—source data 3. [file elife-66011-fig2-data3.xlsx]

## Sheet: Sheet1
Figure 2G	Cell specific rescue of unc-37(e262) mutants with unc-37 cDNA using DA-specific promoter (Punc-4c)
	DA8/DA9 overlap (um)
genotype	wildtype	unc-37(e262)
transgene		No transgene	Ex[Punc-4c::unc-37] #1	Ex[Punc-4c::unc-37] #2	Ex[Punc-4c::unc-37] #1	Ex[Punc-4c::unc-37] #2
			DA8+DA9	DA8+DA9	DA9	DA9
	11.762	91.946	18.502	0	79.253	45.798
	5.589	45.566	12.529	0	45.926	35.516
	14.77	48.232	29.95	17.415	50.403	32.655
	13.463	39.704	54.233	27.561	53.874	38.876
	15.233	64.941	18.781	35.144	49.022	50.373
	23.44	68.715	39.164	14.488	58.222	48.488
	4.772	41.804	10.291	44.989	50.576	73.629
	9.41	56.706	24.287	53.144	46.992	52.363
	7.992	74.525	5.251	5.653	48.401	39.059
	3.616	87.606	34.56	16.5	67.703	49.493
	8.781	28.509	23.405	46.925	34.524	37.878
	8.891	52.272	13.538	0	29.203	35.764
	5.224	51.366	11.674	9.376	34.278	65.334
	11.795	38.909	12.16	24.353	55	59.344
	20.887	58.012	12.098	1.991	74.124
	1.292	79.74	29.128	20.571
	11.537	35.729	28.439	16.456
	2.486	62.639	17.295	15.462
	0	81.318	12.301	2.617
		65.312
		72.157
		47.117
		54.663
		40.737
		37.1
		55.233
		41.175
		35.894
		46.932
		58.538
		82.984
		63.447
		37.878
		49.359
		67.016
		54.715
		60.365
		40.568
