# Supplementary material for: Sustained expression of unc-4 homeobox gene and unc-37/Groucho in postmitotic neurons specifies the spatial organization of the cholinergic synapses in C. elegans
Source: eLife. 2021 Aug 13;10:e66011. doi: 10.7554/eLife.66011 (PMC8363302; doi:10.7554/eLife.66011)
Supplement: Figure 3—source data 1. [file elife-66011-fig3-data1.xlsx]

## Sheet: Sheet1
Figure 3F	Quantification of overlap of DA8 and DA9 synaptic domains in wildtype and unc-4(e2322) mutants grown at permissive and restrictive temperatures
	DA8/DA9 overlap (um)
genotype	wildtype		unc-4(e2322)
experimental condition	16°C	25°C	16°C	25°C	25°C → 16°C	16°C → 25°C
	3.443	8.477	16.054	40.561	15.391	47.694
	7.17	11.787	9.604	60.461	22.746	29.882
	7.067	12.544	19.535	32.017	12.141	41.472
	5.372	0	18.474	78.532	2.994	29.049
	11.031	1.485	12.862	55.574	25.158	33.367
	11.681	14.496	12.317	44.195	17.085	35.245
	14.869	0	14.445	53.005	26.415	42.671
	12.65	11.199	21.08	57.062	23.546	44.144
	0	2.342	16.034	72.207	30.992	40.471
	4.428	8.035	18.621	88.879	32.557	60.849
	20.033	7.027	13.707	37.89	26.39	32.652
	15.442	24.776	24.839	78.888	10.369	31.752
	13.066	11.784	23.773	53.445	18.406	38.112
	11.237	9.132	1.405	38.315	17.02	32.215
	0		4.375	52.677	7.67	48.574
	1.23		13.515	69.494	22.831	40.419
	15.5		12.654	50.461	24.758	62.277
	12.389		7.646	45.328	20.338	52.549
			12.092		29.2	76.327
			0		1.611	28.934
					8.046
					13.234
					8.141
