# Supplementary material for: Sustained expression of unc-4 homeobox gene and unc-37/Groucho in postmitotic neurons specifies the spatial organization of the cholinergic synapses in C. elegans
Source: eLife. 2021 Aug 13;10:e66011. doi: 10.7554/eLife.66011 (PMC8363302; doi:10.7554/eLife.66011)
Supplement: Figure 4—source data 1. [file elife-66011-fig4-data1.xlsx]

## Sheet: Sheet1
Figure 4F	Quantification of overlap of DA8 and DA9 synaptic domains at the L4 stage after embryonic auxin treatment.
	DA8/DA9 overlap (um)
genotype	unc-4(miz40)			unc-37(miz36)
experimental condition	- auxin	+ auxin	Embryonic KD	- auxin	+ auxin	Embryonic KD
	13.457	22.848	3.589	8.63	42.9	44.561
	1.711	34.618	7.81	12.237	55.357	37.923
	2.809	49.639	11.037	5.313	36.611	60.649
	0	43.608	15.319	13.283	72.483	38.026
	14.734	31.01	8.962	18.2	42.451	30.851
	11.153	35.837	1.722	15.85	52.527	54.611
	0	19.795	12.389	14.343	35.787	34.71
	1.633	43.514	0	14.333	45.708	54.264
	5.999	44.11	9.524	9.117	44.21	52.354
	10.6	46.236	7.309	15.328	46.644	39.801
	1.712	28.971	0	28.062	67.115	61.013
	1.706	29.009	15.154	7.794	62.691	17.744
	0	38.351	15.27	31.987	67.901	36.245
	2.97	25.834	8.311	2.729	46.063	39.214
	0	42.671	9.802	7.179	49.695	64.99
	8.552	28.524	0	10.2	13.357	17.348
	7.504	26.782	8.944	13.43	77.13
	0	32.336	13.664	20.437	33.309
	20.409	34.203	16.902	14.52	44.642
	0		5.655	19.798	34.159
	10.784			11.314	51.297
				16.624	39.991
				24.112	65.097
				20.956
				16.298
