# Supplementary material for: Sustained expression of unc-4 homeobox gene and unc-37/Groucho in postmitotic neurons specifies the spatial organization of the cholinergic synapses in C. elegans
Source: eLife. 2021 Aug 13;10:e66011. doi: 10.7554/eLife.66011 (PMC8363302; doi:10.7554/eLife.66011)
Supplement: Figure 4—source data 2. [file elife-66011-fig4-data2.xlsx]

## Sheet: Sheet1
Figure 4G	Quantification of overlap of DA8 and DA9 synaptic domains at the L2 stage after embryonic auxin treatment.
	DA8/DA9 overlap (um)
genotype	wildtype	unc-4(miz40)	unc-37(miz36)
	0	1.284	0
	0	0	2.13
	0	0	2.68
	0	0	3.397
	1.719	2.033	7.253
	0	6.826	6.848
	0	0	12.794
	0	0	8.305
	0	0.835	6.219
	0	0	4.961
	0	0	6.996
	0	0	14.41
	0	0	14.264
	4.724	0	9.385
	0	0	10.369
	1.103	0	6.729
	0	4.926	10.058
	0	1.567	8.112
	0	3.486	11.191
	0	6.858	10.555
	2.245	1.693
	1.378	2.127
		0
		1.378
		0
