# Supplementary material for: Sustained expression of unc-4 homeobox gene and unc-37/Groucho in postmitotic neurons specifies the spatial organization of the cholinergic synapses in C. elegans
Source: eLife. 2021 Aug 13;10:e66011. doi: 10.7554/eLife.66011 (PMC8363302; doi:10.7554/eLife.66011)
Supplement: Figure 5—source data 1. [file elife-66011-fig5-data1.xlsx]

## Sheet: Sheet1
Figure 5F	Quantification of overlap of DA8 and DA9 synaptic domains after postembryonic auxin treatment.
	DA8/DA9 overlap (um)
genotype	wildtype	unc-4(miz40)				unc-37(miz36)
experimental condition	Late postembryonic KD	- auxin	+ auxin	Early postembryonic KD	Late postembryonic KD	- auxin	+ auxin	Early postembryonic KD	Late postembryonic KD
	0	13.457	22.848	41.123	19.135	8.63	42.9	56.836	38.841
	0	1.711	34.618	20.158	23.36	12.237	55.357	45.914	38.658
	10.521	2.809	49.639	31.813	14.112	5.313	36.611	46.538	29.069
	0	0	43.608	19.638	13.966	13.283	72.483	47.904	30.371
	0	14.734	31.01	23.266	13.53	18.2	42.451	51.428	31.6
	4.74	11.153	35.837	28.65	24.2	15.85	52.527	46.685	22.884
	10.943	0	19.795	22.389	5.893	14.343	35.787	41.289	24.75
	1.504	1.633	43.514	17.338	4.963	14.333	45.708	52.707	14.642
	8.747	5.999	44.11	28.72	30.035	9.117	44.21	47.646	38.662
	3.629	10.6	46.236	32.164	22.736	15.328	46.644	50.644	61.185
	7.176	1.712	28.971	23.766	16.692	28.062	67.115	46.925	43.378
	8.502	1.706	29.009	31.164	9.533	7.794	62.691	45.736	38.706
	5.205	0	38.351	19.545	14.515	31.987	67.901	45.865	22.164
	2.564	2.97	25.834	29.984	10.803	2.729	46.063	53.274	55.032
	6.376	0	42.671	33.598	0	7.179	49.695	50.909	26.037
	12.631	8.552	28.524	26.741	0	10.2	13.357	58.283	24.301
	7.704	7.504	26.782	25.225	33.699	13.43	77.13	50.606	31.889
	7.64	0	32.336	24.625	23.772	20.437	33.309	65.257	36.224
	2.362	20.409	34.203	36.089	33.379	14.52	44.642	55.452	17.794
	12.674	0		28.363	26.261	19.798	34.159		30.03
	4.726	10.784		18.968	15.902	11.314	51.297		29.922
	7.572			22.36	16.385	16.624	39.991		31.639
	5.824				32.593	24.112	65.097
					11.104	20.956
					19.004	16.298
