# Supplementary material for: Sustained expression of unc-4 homeobox gene and unc-37/Groucho in postmitotic neurons specifies the spatial organization of the cholinergic synapses in C. elegans
Source: eLife. 2021 Aug 13;10:e66011. doi: 10.7554/eLife.66011 (PMC8363302; doi:10.7554/eLife.66011)
Supplement: Figure 6—source data 1. [file elife-66011-fig6-data1.xlsx]

## Sheet: Sheet1
Figure 6C	Quantification of overlap between DA8 and DA9 synaptic domains in wildtype and ectopic expression of ceh-12 and unc-55A
	DA8/DA9 overlap (um)
genotype	wildtype	Ex[Punc-4c::ceh-12] #1	Ex[Punc-4c::ceh-12] #2	Ex[Punc-4c::unc-55A] #1	Ex[Punc-4c::unc-55A] #2
	11.762	38.794	50.267	16.714	16.934
	5.589	47.269	11.175	22.961	2.687
	14.77	41.823	46.298	13.059	47.125
	13.463	24.962	44.852	10.157	2.685
	15.233	25.55	13.384	8.79	11.873
	23.44	17.132	28.852	8.794	2.768
	4.772	33.778	26.504	16.14	8.733
	9.41	39.152	79.792	15.62	4.235
	7.992	59.45	23.406	7.978	3.744
	3.616	54.637	37.113	33.615	8.188
	8.781	24.287	28.168	25.966	7.937
	8.891	26.763	27.148	20.286	22.628
	5.224	44.527	28.612	13.59	12.474
	11.795	35.364	21.771	14.776	5.076
	20.887	46.809	27.106	15.673	6.605
	1.292	38.855	12.328	19.361	4.803
	11.537	77.441	60.56	9.779	10.982
	2.486	62.265	47.735	5.132	18.566
	0	29.406	41.87	11.973	6.663
		45.417	48.532	14.851	14.416
		38.15	45.971	13.043	17.497
				17.171	13.757
				23.627
