# Supplementary material for: Sustained expression of unc-4 homeobox gene and unc-37/Groucho in postmitotic neurons specifies the spatial organization of the cholinergic synapses in C. elegans
Source: eLife. 2021 Aug 13;10:e66011. doi: 10.7554/eLife.66011 (PMC8363302; doi:10.7554/eLife.66011)
Supplement: Figure 6—source data 2. [file elife-66011-fig6-data2.xlsx]

## Sheet: Sheet1
Figure 6D	Quantification of overlap between DA8 and DA9 synaptic domains in ceh-12 mutant animals.
	DA8/DA9 overlap (um)
genotype	wildtype	ceh-12(gk391)	unc-4(e120)	ceh-12(gk391);unc-4(e120)	unc-37(e262)	ceh-12(gk391) unc-37(e262)
	11.762	5.089	50.151	40.885	91.946	46.813
	5.589	11.765	50.748	45.417	45.566	48.369
	14.77	0	60.524	75.25	48.232	47.416
	13.463	5.97	37.239	43.198	39.704	42.065
	15.233	8.484	42.562	44.875	64.941	45.159
	23.44	1.154	57.752	40.754	68.715	42.092
	4.772	3.512	33.672	48.178	41.804	36.351
	9.41	5.339	33.803	54.464	56.706	53.648
	7.992	9.448	56.622	34.725	74.525	54.501
	3.616	0	42.789	53.88	87.606	35.969
	8.781	14.325	19.43	32.639	28.509	43.654
	8.891	14.957	67.294	50.278	52.272	62.908
	5.224	11.906	46.464	36.552	51.366	54.671
	11.795	7.266	34.578	40.998	38.909	63.277
	20.887	8.873	54.333	71.4	58.012	46.21
	1.292	4.087	40.624	29.777	79.74	58.277
	11.537	13.349	50.61	67.095	35.729	53.518
	2.486	14.573	37.197	35.842	62.639	43.969
	0	7.915	56.49	31.038	81.318	44.672
		4.215	32.466	34.261	65.312	81.786
		9.36	61.668	45.43	72.157	74.448
			55.418	42.009	47.117	43.455
			74.818	43.206	54.663	74.253
			62.351	38.852	40.737
			44.353	50.082	37.1
			53.348		55.233
			48.265		41.175
			37.348		35.894
			49.718		46.932
			55.041		58.538
			48.031		82.984
			61.944		63.447
			31.348		37.878
			38.822		49.359
			59.01		67.016
			40.79		54.715
			58.917		60.365
			56.747		40.568
			33.288
			43.971
