# Supplementary material for: Sustained expression of unc-4 homeobox gene and unc-37/Groucho in postmitotic neurons specifies the spatial organization of the cholinergic synapses in C. elegans
Source: eLife. 2021 Aug 13;10:e66011. doi: 10.7554/eLife.66011 (PMC8363302; doi:10.7554/eLife.66011)
Supplement: Figure 6—source data 3. [file elife-66011-fig6-data3.xlsx]

## Sheet: Sheet1
Figure 6E	Quantification of overlap between DA8 and DA9 synaptic domains in bar-1 mutant animals.
	DA8/DA9 overlap (um)
genotype	wildtype	bar-1(ga80)	unc-4(e120)	unc-4(e120); bar-1(ga80)	unc-37(e262)	unc-37(e262); bar-1(ga80)
	11.762	16.583	50.151	20.61	91.946	14.927
	5.589	0	50.748	36.598	45.566	42.331
	14.77	3.698	60.524	13.509	48.232	24.474
	13.463	2.582	37.239	17.294	39.704	26.033
	15.233	1.652	42.562	29.796	64.941	23.892
	23.44	9.504	57.752	33.881	68.715	32.693
	4.772	7.675	33.672	26.532	41.804	33.99
	9.41	8.419	33.803	34.381	56.706	24.263
	7.992	5.952	56.622	22.927	74.525	36.173
	3.616	14.149	42.789	21.881	87.606	26.308
	8.781	15.262	19.43	35.303	28.509	22.949
	8.891	8.263	67.294	7.73	52.272	30.022
	5.224	6.233	46.464	30.255	51.366	42.697
	11.795	5.022	34.578	11.039	38.909	37.436
	20.887	8.007	54.333	26.032	58.012	28.525
	1.292	5.663	40.624	28.78	79.74	37.887
	11.537	6.674	50.61	33.077	35.729	40.181
	2.486	8.159	37.197	42.84	62.639
	0	6.479	56.49	23.092	81.318
		5.909	32.466	26.631	65.312
		4.709	61.668	32.05	72.157
		10.886	55.418		47.117
		0	74.818		54.663
		1.4	62.351		40.737
		30.711	44.353		37.1
		18.309	53.348		55.233
			48.265		41.175
			37.348		35.894
			49.718		46.932
			55.041		58.538
			48.031		82.984
			61.944		63.447
			31.348		37.878
			38.822		49.359
			59.01		67.016
			40.79		54.715
			58.917		60.365
			56.747		40.568
			33.288
			43.971
